# Supplementary material for: Technical Note: Constraining the hydroxyl (OH) radical in the tropics with satellite observations of its drivers: First steps toward assessing the feasibility of a global observation strategy
Source: Copernicus journal article supplement (doi:10.5194/acp-2022-763), 2023-01-04
Supplement: Supplementary file [file acp-2022-763-AC1-supplement.pdf]

We thank the reviewer for their comments. In response to the reviewer's concerns, we have included references to the suggested articles as well as several additional articles which we list at the end of this response. Responses to comments are shown below in red, while quotations from the revised manuscript are indicated in blue. Line numbers for the reviewer comments refer to the original manuscript.

## Reviewer 1

With the advance of satellite instruments and machine learning techniques, atmospheric chemistry research is developing fast. This paper does an attempt to build a machine learning method for total (tropospheric) column OH, based on satellite observations. To this end, they train a GBRT model on results of a chemistry transport model and apply this model to satellite observations from mainly MOPITT, OMI, AIRS, but also location (i.e. solar intensity). The basic idea is that OH in the remote atmosphere in the tropics is driven mainly by the abundance of O<sub>3</sub>, H<sub>2</sub>O, NO<sub>x</sub>, CO, and hydrocarbons. In that respect, this provides an original contribution and shows some promises for the future.

The main problem I have with the paper is that is insufficiently credits and discusses other developments in the field. Reading the paper, I was wondering if the authors are aware of these developments at all? In a fast-advancing field, reading, referencing, and discussing the work of others is of utmost importance. And the paper fails to do this. References to own work dominate. Below I outline how the paper should improve to become acceptable for publication.

### General methodology

In studying OH in the remote atmosphere, we have to rely on knowledge on atmospheric chemistry. In this paper, the authors use results of atmospheric chemistry simulations to train a machine learning algorithm. No criticism here. In the discussion, however, they "come up" with the idea to reduce the uncertainties between the 3D model results and satellite observations (without any references). Long-standing efforts have been made to "merge" satellite information and models in a process called data assimilation. First, there is the idea of chemical data assimilation, performed in e.g. the EU Copernicus services (e.g. [https://atmosphere.copernicus.eu/sites/default/files/custom-uploads/3rd-jointtraining/ACT2021\\_AInness.pdf](https://atmosphere.copernicus.eu/sites/default/files/custom-uploads/3rd-jointtraining/ACT2021_AInness.pdf)).

The authors of this manuscript work in the NASA Atmospheric Chemistry and Dynamics Laboratory, whose researchers have contributed to advances in atmospheric data assimilation for decades, so we have substantial familiarity with data assimilation. However, the methodology we describe here is fundamentally different from data assimilation in that we are only using the 3D model as a training dataset for a machine learning model. We are making no efforts to ingest satellite data into a 3D model to improve representation of any species within that model. At no point are we running our own 3D model. As such, we did not feel that a discussion of data assimilation methods in the introduction was warranted. We have, however, added the following:

Miyazaki et al. (2020) created a data assimilation framework that ingested satellite observations of CO, NO<sub>2</sub>, O<sub>3</sub>, and HNO<sub>3</sub> (nitric acid) into multiple CTMs. The data assimilation reduced the spread in average OH among the models and brought the interhemispheric ratio closer to unity, in line with values suggested by MCF observations (e.g. Patra et al., 2014). These results suggest that the incorporation of satellite observations into a modeling framework can improve the representation of OH.

For the discussion in Section 6, we acknowledge that there are similar applications between data assimilation methods and what we propose here, although again, they are fundamentally different in that we are not proposing to re-run a 3D model. We have added the following to the manuscript:

“This would serve as a computationally efficient complement to other methodologies constraining models with observations (e.g. Miyazaki et al., 2020, Miyazaki et al., 2021) to identify the impacts of these errors on the atmospheric oxidation capacity.”

Second, some authors worked their whole life on the subject of OH, satellites, and models, and do not receive even a citation in the manuscript (e.g. <https://acp.copernicus.org/articles/20/931/2020/>). I am not claiming that the work in this paper is useless. What I am saying is that the added value could be much more when proper credit and discussion is dedicated to related studies.

We have added the following references to the paper, in addition to the Miyazaki et al (2020) and Boersma et al (2018) papers suggested by the reviewer, so that the cited works are more comprehensive:

Stevenson et al. (2020): “...with modeled trends disagreeing with those derived from observationally constrained methods (Stevenson et al., 2020).”

Wild et al. (2020): “Using Gaussian emulation, Wild et al. (2020) found that the relative importance of drivers of OH variability differed widely among three CTMs.”

Spivakovsky et al. (1990) and Lelieveld et al. (2016): “This spatial heterogeneity is further caused by the large variation in the relative importance of drivers of OH loss and production in different regions of the atmosphere (e.g. Spivakovsky et al., 1990;Lelieveld et al., 2016).”

Naus et al. (2021) : “...although there has been recent success when using three dimensional inversion techniques (Naus et al., 2021).”

Patra et al. (2014): “The data assimilation reduced the spread in average OH among the models and brought the interhemispheric ratio closer to unity, in line with values suggested by MCF observations (e.g. Patra et al., 2014).”

Miyazaki et al. (2021)

We would also point out that OH modeling and chemistry are vast topics with decades of literature behind each, so we have focused on providing the background that we feel is necessary to lay the groundwork for our study while also keeping the paper to a manageable length.

In the revised manuscript, the authors should catch up with existing work and should discuss that in the introduction and discussion. This should replace the current self-centered manuscript with restricted references to work of other groups.

In the original manuscript, 12% of the cited works have one of the co-authors of this paper as the primary author, so we do not believe that our manuscript focuses too heavily on our work at the

expense of other researchers. When we do cite ourselves, it is mostly because we are building on previous work that is highly relevant to this study.

#### NO<sub>2</sub> satellite data

More or less along the same lines. NO<sub>2</sub> abundance in the remote tropics appears to be very important in determining TCOH. In section 5, the authors attempt to use alternative satellite products. In their evaluation of the results, they systematically refer to differences with their product as ‘biases’. Although they evaluated to some extent their TCOH product against Atom data, with relative OK result, this does not imply that their product is OK in May 2018 (the analyzed month) and that all the other results are biased.

First, the evaluation with the ATom data is an evaluation of the methodology itself, not of the satellite product TCOH. We use observations from the ATom campaign as inputs to the model to determine whether we can reproduce observed TCOH. This is different than evaluating the satellite product determined from the OMI/MOPITT/AIRS observations. Nowhere in the paper do we make assertions on the absolute accuracy of the OMI/MOPITT/AIRS TCOH product, primarily, because as we state in the conclusions, there are insufficient observations of TCOH to fully evaluate the product.

Second, it was not our intention to judge the absolute accuracy of any satellite retrieval or imply that any retrieval was better than another, as we clearly stated in the original manuscript (Line 628 of the original manuscript). Indeed, one of the conclusions of the work is that we need more observations in the remote atmosphere to determine which retrievals, if any, are accurate in this area. To make this point more explicitly clear, we have removed the word bias from the paper and use “difference” or analogous words. For example, the paragraph comparing OMI/MOPITT/AIRS retrievals to TROPOMI now reads:

In general, observations from TROPOMI agree with those from the satellites in Table 1, with the exception of NO<sub>2</sub> and HCHO. Ozone, H<sub>2</sub>O<sub>(v)</sub>, and CO from TROPOMI are highly correlated ( $r^2$  of 0.85 or higher) and agree within 10% on average with their respective retrievals from OMI, MOPITT, and AIRS. On the other hand, TROPOMI KNMI-NO<sub>2</sub> is systematically higher (145% on average), and TROPOMI HCHO is 20% lower than their corresponding OMI retrievals. The higher TCOH from the TROPOMI product is consistent with the increase in NO<sub>2</sub>, which would lead to higher secondary production of OH. Further, while TROPOMI KNMI-NO<sub>2</sub> is modestly correlated with OMI NO<sub>2</sub> ( $r^2 = 0.61$ ), TROPOMI and OMI HCHO are not correlated ( $r^2 = 0.23$ ), highlighting the difficulty of the HCHO retrieval. Note that we are not seeking to determine which retrieval, if any, is more accurate. We are highlighting the differences to emphasize the impact that systematic differences in retrieval magnitudes of GBRT model inputs can have on the resultant TCOH.

On top of that, they fail to refer to an extensive (EU-funded) program QA4eCV in which the NO<sub>2</sub> products (e.g. of OMI) have been evaluated (e.g. <https://amt.copernicus.org/articles/11/6651/2018/>). This effort is so central to the discussion, that it really shameful that relevant literature is not cited. We have added a reference to this paper:

Recent efforts, such as the QA4ECV (Quality Assurance for the Essential Climate Variables, to improve NO<sub>2</sub> retrieval algorithms have reduced uncertainty, particularly over land (Boersma et al., 2018), although it is unclear how the accuracy of these retrievals translates to the remote tropics as validation data are still extremely limited.

As you point out, our work is centered in the remote tropics, a region where there is very little published literature with NO<sub>2</sub> retrieval validation. The QA4eCV paper only shows validation of the OMI product against observations at one site in China, a region outside of our study domain. Because uncertainties over the remote ocean are generally higher than in more polluted regions, it is unlikely that these results are applicable to the research region. In the original manuscript, we do cite the work of Wang et al (2020) who evaluated the TROPOMI retrieval used in this study over the remote Pacific. We now also include a reference to Verhoelst et al, 2021 which compares TROPOMI retrievals over Reunion to ground-based observations.

Wang et al. (2020) found that this retrieval was biased high when compared to ship-based observations from a MAX-DOAS instrument over the remote oceans, while Verhoelst et al. (2021) found good agreement between the retrieval and ground-based observations in Reunion.

I found the paper a pleasant read, presenting an interesting view for future exploration. In that respect, publication is possible, but the paper should discuss and give credit to internationally well-established efforts, which would require a major overhaul of the introduction and discussion.

#### **Specific Comments:**

**Line 144 – 145:** Nothing said yet about satellites... I assume OMI?

That is correct. We have added the following text for clarification:

We use instantaneous OH output from MERRA2 GMI at 14:00 local time for each day of a given month across the years 2005 to 2019, a timeframe that maximizes overlap between the operational lifetime of the satellites listed in Table 1 and the period of the MERRA2 GMI simulation.

**Line 148:** I can imagine that cloud fractions < 0.3 still could be included in machine learning?

As stated in the manuscript, we omit grid boxes with cloud fractions greater than 0.3 in the training dataset. While those values could be included, we wish to make the training dataset as close as possible to the satellite data that will be used as inputs. We've clarified this in the text:

For a given month and year, we calculate daily tropospheric column values across the grid, filtering out columns where the maximum cloud fraction in that column was greater than 30% in order to align the training targets more closely with satellite data, where retrievals of some species are often filtered for cloud cover.

**Table 1:** CO overpass is not at 14:00.

We mention the MOPITT overpass time in Lines 192 and again in Lines 271. For clarification, we have also added the following text to the Table 1 caption:

Overpass times are ~13:30 LST for all satellites except MOPITT, which has a ~10:30 LST overpass.

**Line 174:** Why not 14:00?

The time used for the SZA calculation is arbitrary. Because we're looking at monthly averages and SZA is independent of longitude when calculated for a given LST, SZA in the GBRT model primarily provides additional information about the distance from the latitude with maximum insolation. Because this is not a process-based model, the actual SZA value is not relevant to the calculation, only the relative difference of the SZA from one location to another.

**Line 232:** Mention if you use tropospheric sub-column (stratospheric correction...)

Good point. We mention that we use the tropospheric column NO<sub>2</sub> in Table 1 but failed to highlight that here. We have made the correction.

**Line 247:** Above, 10 LST

While the MOPITT overpass is ~10:30 LST, output from MERRA2 GMI is at 10:00 LST. We have clarified this point in the text:

Output is available at daily- and monthly-averaged resolution, as well as instantaneous values at 10:00 and 14:00 LST. These times are within approximately 30 minutes of the overpass times of the satellites described in Section 2.2.

**Line 420:** Rather strange. What differences. I could imagine that you could perform an analysis by which the satellite data are one-by-one replaced by the model counterpart, to understand what drives the lower TCOH in the multi-satellite product compared to the model. Why would this be beyond the scope? This type of analysis is certainly possible, as demonstrated between our comparisons of the OMI and TROPOMI NO<sub>2</sub>. Our goal with this manuscript, however, is not to understand the differences between the MERRA2 GMI simulation and a satellite-constrained OH product. As stated in the last paragraph of the introduction, our goals for this manuscript are "assessing the feasibility of our methodology, identifying potential limitations, and suggesting areas of improvement in the current observational network." While understanding these differences are interesting questions and are something we will most likely look at in future work, adding a discussion here would be a distraction from our intended objectives.

**Line 505:** now I am confused. I thought Atom TCOH was derived from measured OH? How this suggests a box model is employed to derive Atom OH.

We are recalculating the TCOH with the GBRT model using NO<sub>2</sub> from a box model. The observed TCOH columns from ATom remain the same. We now say "Recalculating the GBRT TCOH from ATom..." to clarify this point.

**Line 543:** This is a strange addition, because you seem to propagate errors through the GBRT model. We've reworded the text to clarify our point:

"In contrast to NO<sub>2</sub>, uncertainties in TCOH resulting from HCHO maximize in regions with higher HCHO columns (Fig. 6). The magnitude of that uncertainty is likely an overestimate as the actual retrieval uncertainty for HCHO in these regions is significantly lower than the value assumed for the error analysis."

**Line 553:** Some indication of these scales is needed. Yearly? 1x1 degree?

We specify the temporal and spatial scales as monthly and 1 x 1 degree in the second paragraph of the section.

**Line 583:** I thought this was only for the NO<sub>2</sub> product?

The text now reads “Horizontal resolution for the month examined here (May 2018) is as high as 7km x 3.5 km at nadir”.

**Line 607:** this now becomes very messy. Above you say that TROPOMI has a water vapour product. So, why not include that in the training ( I guess the model has to be sampled slightly different)

TROPOMI has a water vapor column product, but, as stated in the text, there is not an analogous water vapor layers product to that provided by AIRS. We have added the word column to clarify further that we are using the TROPOMI column product. As the text stands, it clearly states that we created a new model with all inputs except for the water vapor layers, implying that we include the water vapor column.

Line 612: This makes more sense in section 5.3.1, which should then be renamed.

We have renamed Section 5.3.1 and moved the first paragraph of Section 5.3.2 to the end of Section 5.3.1.

Line 616: AIRS does not make sense here, because AIRS is not used

AIRS is used. As discussed above and in the text, we only removed the water vapor layers from the product, not the water vapor column.

Line 622: I do not agree with the wording here. Why would this estimate be overestimated. The validation of the other product with Atom was not that convincing. So, I propose not to qualify one product better than another...

The text now reads:

While there is modest correlation between the two ( $r^2 = 0.63$ ), the TROPOMI product is 27.6% larger than the OMI/MOPITT/AIRS product, with higher values across almost the entire domain.

Line 627: again, wording suggests that OMI/MOPITT/AIRS is the truth.

As we explicitly state in the text, we are not judging the accuracy of any particular retrieval. We are not saying that TROPOMI is wrong and OMI/MOPITT/AIRS retrievals are correct. We reported the difference in TROPOMI retrievals with respect to the other retrievals because those are the retrievals that underlie our baseline TCOH product. We have changed the paragraph to the following to make this point even more explicitly clear (Line 657):

In general, observations from TROPOMI agree with those from the satellites in Table 1, with the exception of NO<sub>2</sub> and HCHO. Ozone, H<sub>2</sub>O<sub>(v)</sub>, and CO from TROPOMI are highly correlated ( $r^2$  of 0.85 or higher) and agree within 10% on average with their respective retrievals from OMI, MOPITT, and AIRS. On the other hand, TROPOMI KNMI-NO<sub>2</sub> is systematically higher (145% on average), and TROPOMI HCHO is 20% lower than their corresponding OMI retrievals. The higher TCOH from the TROPOMI product is consistent with the increase in NO<sub>2</sub>, which would lead to higher secondary production of OH. Further, while TROPOMI KNMI-NO<sub>2</sub> is modestly correlated with OMI NO<sub>2</sub> ( $r^2 = 0.61$ ), TROPOMI and OMI HCHO are not correlated ( $r^2 = 0.23$ ), highlighting the difficulty of the HCHO retrieval. Note that we are not seeking to determine which retrieval, if any, is more accurate. We are highlighting the differences to emphasize the impact that

systematic differences in retrieval magnitudes of GBRT model inputs can have on the resultant TCOH.

Line 645: ??? This overvalues the capabilities of the machine learning model...I agree it would somehow represent the non-linear nature, but here things are mixed up....

It's unclear what you mean by this statement. Swapping in variables to understand their relative importance on a target variable, even for non-linear systems, has been done before (see, for example, Nicely et al. 2016).

Line 653: get more confused: is this against observation of a (potentially biased low?) OMI retrieval  
We have changed this sentence to read:

When compared to OMI, the MINDS NO<sub>2</sub> retrieval is 58% higher, as compared to 145% higher for the KNMI retrieval.

Line 674: what I understand is that this information is available, but not analysed in this manuscript?  
Why not?

As we state in the introduction, the point of this manuscript is not a detailed analysis of OH using the TCOH product, rather it is to demonstrate the viability of the methodology and to understand its strengths and weaknesses. An analysis of OH temporal and spatial variability is a topic unto itself and will be examined in future work.

Line 679: VOC chemistry is also present in the tropics. So this is more a land-ocean aspect.

Yes, we agree that there is VOC chemistry in the tropics. To make it more explicitly clear we now say "Expansion of the product over land will likely require..."

Line 683: Very USA centric. You fail to refer to S4 (Copernicus) and GEMS (Asia, already launched.)....  
The text now reads (Line 774):

For example, current and upcoming geostationary air quality satellites such as Sentinel 4, TEMPO (Tropospheric Emissions: Monitoring of Pollution), and GEMS (Geostationary Environment Monitoring Spectrometer) could provide most of the necessary inputs to the machine learning model...

Line 707: See my main point: this methodology is followed by other groups, but you fail to address these methods in the introduction....

We have added the following (Line 802):

"This would serve as a computationally efficient compliment to other methodologies constraining models with observations (e.g. Miyazaki et al., 2020) to identify the impacts of these errors on the atmospheric oxidation capacity."

Line 732: I think the issue is NOT the instrument design, but simply there is not enough effort to perform calibration and validation of satellite products. There has been a huge effort in Europe (QA4ECV) including NO<sub>2</sub>. Seems the authors are unaware if this, which is kind of frightening in light of this paper.

We are aware of this effort and similar efforts at NASA (e.g. the MINDS project mentioned in the paper). The point of the final paragraph of the paper is to highlight the need for further validation of satellite retrievals in the remote tropics, the region relevant to this work. While there have been several validation efforts of the various OMI and TROPOMI retrievals in polluted regions, to our knowledge, there is little published literature in the remote atmosphere. The QA4ECV paper you cite does show excellent agreement between ground-based observations from one site in China and the OMI retrieval, but this is not located in our target region. And as NO<sub>2</sub> retrievals have evolved with time, their uncertainties have definitely improved, particularly in polluted regions, but, based on our understanding of the literature (e.g. Lamsal et al, 2021), in the remote atmosphere, uncertainties still remain high because of the methodology used to separate the tropospheric portion from the total column.

The final paragraph now reads:

Finally, accuracy of the TCOH product is dependent on the accuracy of the satellite retrievals input into the machine learning model, with the NO<sub>2</sub> retrieval having the largest effect. To reduce the uncertainty of the TCOH product, more information about the accuracy of individual NO<sub>2</sub> retrievals is required. Currently, there is little validation of OMI and TROPOMI NO<sub>2</sub> retrievals in the remote, tropical atmosphere, so it is difficult to assess, which retrievals, if any, are correct. Recent efforts, such as the QA4ECV (Quality Assurance for the Essential Climate Variables, to improve NO<sub>2</sub> retrieval algorithms have reduced uncertainty, particularly over land (Boersma et al., 2018), although it is unclear how the accuracy of these retrievals translates to the remote tropics as validation data are still extremely limited. Even retrievals of TROPOMI and OMI made with the same algorithm show differences, suggesting that instrumental differences could also affect the results. Future satellite missions should focus on trying to reduce the uncertainty in NO<sub>2</sub> retrievals, particularly in the remote atmosphere, both through improvements in instrument design and algorithm development.

#### References:

Boersma, K. F., Eskes, H. J., Richter, A., De Smedt, I., Lorente, A., Beirle, S., van Geffen, J. H. G. M., Zara, M., Peters, E., Van Roozendaal, M., Wagner, T., Maasakkers, J. D., van der A, R. J., Nightingale, J., De Rudder, A., Irie, H., Pinardi, G., Lambert, J. C., and Compernelle, S. C.: Improving algorithms and uncertainty estimates for satellite NO<sub>2</sub> retrievals: results from the quality assurance for the essential climate variables (QA4ECV) project, *Atmos. Meas. Tech.*, 11, 6651-6678, 10.5194/amt-11-6651-2018, 2018.

Lelieveld, J., Gromov, S., Pozzer, A., and Taraborrelli, D.: Global tropospheric hydroxyl distribution, budget and reactivity, *Atmos. Chem. Phys.*, 16, 12477-12493, 10.5194/acp-16-12477-2016, 2016.

Miyazaki, K., Bowman, K. W., Yumimoto, K., Walker, T., and Sudo, K.: Evaluation of a multi-model, multi-constituent assimilation framework for tropospheric chemical reanalysis, *Atmos. Chem. Phys.*, 20, 931-967, 10.5194/acp-20-931-2020, 2020.

Miyazaki, K., Bowman, K., Sekiya, T., Takigawa, M., Neu, J. L., Sudo, K., Osterman, G., and Eskes, H.: Global tropospheric ozone responses to reduced NO<sub>x</sub> emissions linked to the COVID-19 worldwide lockdowns, *Science Advances*, 7, eabf7460, 10.1126/sciadv.abf7460, 2021.



Naus, S., Montzka, S. A., Patra, P. K., and Krol, M. C.: A three-dimensional-model inversion of methyl chloroform to constrain the atmospheric oxidative capacity, *Atmospheric Chemistry and Physics*, 21, 4809-4824, 10.5194/acp-21-4809-2021, 2021.

Patra, P. K., Krol, M. C., Montzka, S. A., Arnold, T., Atlas, E. L., Lintner, B. R., Stephens, B. B., Xiang, B., Elkins, J. W., Fraser, P. J., Ghosh, A., Hints, E. J., Hurst, D. F., Ishijima, K., Krummel, P. B., Miller, B. R., Miyazaki, K., Moore, F. L., Muhle, J., O'Doherty, S., Prinn, R. G., Steele, L. P., Takigawa, M., Wang, H. J., Weiss, R. F., Wofsy, S. C., and Young, D.: Observational evidence for interhemispheric hydroxyl-radical parity, *Nature*, 513, 219-223, 10.1038/nature13721, 2014.

Spivakovsky, C. M., Yevich, R., Logan, J. A., Wofsy, S. C., McElroy, M. B., and Prather, M. J.: Tropospheric OH in a three-dimensional chemical tracer model: An assessment based on observations of CH<sub>3</sub>CCl<sub>3</sub>, *Journal of Geophysical Research: Atmospheres*, 95, 18441-18471, 10.1029/JD095iD11p18441, 1990.

Stevenson, D. S., Zhao, A., Naik, V., and Connor, F. M., Tilmes, S., Zeng, G., Murray, L. T., Collins, W. J., Griffiths, P., Shim, S., Horowitz, L. W., Sentman, L., and Emmons, L.: Trends in global tropospheric hydroxyl radical and methane lifetime since 1850 from AerChemMIP, *Atmos. Chem. Phys.*, 10.5194/acp-2019-1219, 2020.

Verhoelst, T., Compernelle, S., Pinardi, G., Lambert, J. C., Eskes, H. J., Eichmann, K. U., Fjærraa, A. M., Granville, J., Niemeijer, S., Cede, A., Tiefengraber, M., Hendrick, F., Pazmiño, A., Bais, A., Bazureau, A., Boersma, K. F., Bogner, K., Dehn, A., Donner, S., Elokho, A., Gebetsberger, M., Goutail, F., Grutter de la Mora, M., Gruzdev, A., Gratsea, M., Hansen, G. H., Irie, H., Jepsen, N., Kanaya, Y., Karagiozidis, D., Kivi, R., Kreher, K., Levelt, P. F., Liu, C., Müller, M., Navarro Comas, M., Piters, A. J. M., Pommereau, J. P., Portafaix, T., Prados-Roman, C., Puenteadura, O., Querel, R., Remmers, J., Richter, A., Rimmer, J., Rivera Cárdenas, C., Saavedra de Miguel, L., Sinyakov, V. P., Stremme, W., Strong, K., Van Roozendaal, M., Veefkind, J. P., Wagner, T., Wittrock, F., Yela González, M., and Zehner, C.: Ground-based validation of the Copernicus Sentinel-5P TROPOMI NO<sub>2</sub> measurements with the NDACC ZSL-DOAS, MAX-DOAS and Pandora global networks, *Atmos. Meas. Tech.*, 14, 481-510, 10.5194/amt-14-481-2021, 2021.

Wild, O., Voulgarakis, A., and Connor, F., Lamarque, J.-F., Ryan, E. M., and Lee, L.: Global sensitivity analysis of chemistry-climate model budgets of tropospheric ozone and OH: exploring model diversity, *Atmospheric Chemistry and Physics*, 20, 4047-4058, 10.5194/acp-20-4047-2020, 2020.
