# Supplementary material for: Technical Note: Constraining the hydroxyl (OH) radical in the tropics with satellite observations of its drivers: First steps toward assessing the feasibility of a global observation strategy
Source: Copernicus journal article supplement (doi:10.5194/acp-2022-763), 2023-01-04
Supplement: Supplementary file [file acp-2022-763-RC1-supplement.pdf]

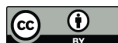

1     **Technical Note: Constraining the hydroxyl (OH) radical in the tropics with satellite observations of its**  
2     **drivers: First steps toward assessing the feasibility of a global observation strategy**

3  
4     Daniel C. Anderson<sup>1,2</sup>, Bryan N. Duncan<sup>2</sup>, Julie M. Nicely<sup>2,3</sup>, Junhua Liu<sup>2,4</sup>, Sarah A. Strode<sup>2,4</sup>, Melanie B.  
5     Follette-Cook<sup>5</sup>

- 6  
7     1. GESTAR II, University of Maryland Baltimore County, Baltimore, MD, USA  
8     2. Atmospheric Chemistry and Dynamics Laboratory, NASA Goddard Space Flight Center, Greenbelt,  
9     MD, USA  
10    3. Earth System Science Interdisciplinary Center, University of Maryland, College Park, MD, USA  
11    4. GESTAR II, Morgan State University, Baltimore, MD, USA  
12    5. Mesoscale Atmospheric Processes Laboratory, NASA Goddard Space Flight Center, Greenbelt, MD,  
13    USA

14  
15    Correspondence to: Daniel C. Anderson (daniel.c.anderson@nasa.gov)

16  
17    **Abstract**

18    Despite its importance in controlling the abundance of methane (CH<sub>4</sub>) and a myriad of other  
19    tropospheric species, the hydroxyl radical (OH) is poorly constrained due to its large spatial  
20    heterogeneity and the inability to measure tropospheric OH with satellites. Here, we present a  
21    methodology to infer tropospheric column OH (TCOH) in the tropics over the open oceans using a  
22    combination of a machine learning model, output from a simulation of the GEOS model, and satellite  
23    observations. Our overall goals are to assess the feasibility of our methodology, to identify potential  
24    limitations, and to suggest areas of improvement in the current observational network. The  
25    methodology reproduces the variability of TCOH from independent 3D model output and of  
26    observations from the Atmospheric Tomography mission (ATom). While the methodology also  
27    reproduces the magnitude of the 3D model validation set, the accuracy of the magnitude when applied  
28    to observations is uncertain because current observations are insufficient to fully evaluate the machine  
29    learning model. Despite large uncertainties in some of the satellite retrievals necessary to infer OH,  
30    particularly for NO<sub>2</sub> and HCHO, current satellite observations are of sufficient quality to apply the  
31    machine learning methodology, resulting in an error comparable to that of *in situ* OH observations.  
32    Finally, the methodology is not limited to a specific suite of satellite retrievals. Comparison of TCOH  
33    determined from two sets of retrievals does show, however, that systematic biases in NO<sub>2</sub>, resulting  
34    both from retrieval algorithm and instrumental differences, lead to relative biases in the calculated  
35    TCOH. Further evaluation of NO<sub>2</sub> retrievals in the remote atmosphere is needed to determine their  
36    accuracy. With slight modifications, a similar methodology could likely be expanded to the extra-tropics  
37    and over land, with the benefits of increasing our understanding of the atmospheric oxidation capacity  
38    and, for instance, informing understanding of recent CH<sub>4</sub> trends.

39  
40    **1 Introduction**

41    The hydroxyl radical (OH) dictates the lifetime of many tropospheric species, including carbon monoxide  
42    (CO), methane (CH<sub>4</sub>), and numerous volatile organic compounds (VOCs). Knowledge of OH is therefore  
43    necessary to understand the abundance, distribution, and variability of these species. For instance,  
44    Rigby et al. (2017) and Laughner et al. (2021) attribute recent trends and increases in CH<sub>4</sub> at least  
45    partially to changes in OH abundance. Current constraints on OH are insufficient, however, to assess its  
46    relative importance in controlling these trends (Turner et al., 2017).

47



48 Differences in OH distributions among chemistry transport (CTM) and chemistry climate models (CCM)  
49 suggest that these models are insufficient to inform understanding of OH abundance and variability  
50 without further observational constraints. OH abundance can differ by up to 80% among models  
51 constrained with identical emissions in intercomparison projects (Voulgarakis et al., 2013; Nicely et  
52 al.; Zhao et al., 2019; Murray et al., 2021). Variables such as the photolysis frequency of O<sub>3</sub> (JO<sup>1</sup>D) (Nicely  
53 et al., 2020), the NO<sub>x</sub> lifetime (NO<sub>x</sub> = NO + NO<sub>2</sub>), and the oxidation efficiency of VOCs (Murray et al.,  
54 2021) contribute to these inter-model variations in OH. Likewise, the response of OH to the El Niño  
55 Southern Oscillation (ENSO), the dominant mode of OH variability on monthly and seasonal timescales  
56 (Anderson et al., 2021; Turner et al., 2018), and other modes of internal climate variability can vary  
57 widely among models (Anderson et al., 2021).

58  
59 Despite this need for better constraints, observations of tropospheric OH are limited. The hydroxyl  
60 radical has a lifetime of approximately 1s (Mao et al., 2009), resulting in large spatial heterogeneity in  
61 both the horizontal and vertical. A strategic, representative in situ observational network is therefore  
62 unfeasible. As a result, observations of OH are generally limited to intensive field campaigns (Miller and  
63 Brune, 2022) that have narrow spatial and temporal coverage. While remotely-sensed OH observations  
64 are available, those from satellites are limited to the stratosphere (e.g., Pickett et al., 2008), while  
65 ground-based observations of total column OH are dominated by the stratospheric contribution (e.g.,  
66 Burnett and Minschwaner, 1998).

67  
68 Reference gases with well-characterized sources and an OH sink, such as methyl chloroform (MCF), can  
69 be used to infer OH abundance (Lovelock, 1977). This methodology, however, generally yields no  
70 information on spatial heterogeneity beyond the hemispheric scale (e.g., Montzka et al., 2011; Rigby et  
71 al., 2017; Naus et al., 2019). For MCF in particular, recent declines in tropospheric abundance will soon  
72 dictate the need for a new reference species (Liang et al., 2017).

73  
74 Multiple studies have attempted to constrain OH through the creation of proxies and the application of  
75 satellite retrievals of OH drivers. Murray et al. (2014) showed that global OH strongly correlated with a  
76 combination of JO<sup>1</sup>D, water vapor (H<sub>2</sub>O<sub>(v)</sub>), and the tropospheric sources of reactive nitrogen and carbon  
77 in the GEOS-Chem model. Murray et al. (2021) demonstrated that OH correlated with this proxy in  
78 multiple CTMs, although the relationship differs strongly among models. Wolfe et al. (2019) developed  
79 a proxy for OH based on formaldehyde (HCHO) production and loss rates. They applied that proxy to  
80 satellite HCHO observations to estimate OH columns in the remote troposphere, a region where HCHO  
81 abundance is low and the satellite retrievals are reflective of the *a priori* (Zhu et al., 2016). Using  
82 machine learning, chemical transport model output, and retrievals of NO<sub>2</sub> and HCHO, Zhu et al. (2022a)  
83 developed a method to estimate surface OH in North American urban areas. Finally, Pimlott et al.  
84 (2022) used a steady state approximation of OH, including primary production from H<sub>2</sub>O and O<sub>3</sub> and loss  
85 from CO, CH<sub>4</sub>, and O<sub>3</sub>, to estimate OH between 600 and 700 hPa using observations from IASI (Infrared  
86 Atmospheric Sounding Interferometer). A logical next step, building on the results of these studies, is  
87 the development of a methodology to constrain OH that ingests multiple satellite retrievals,  
88 encompasses the breadth of OH chemical and dynamical drivers, and spans a significant enough portion  
89 of the globe to inform variability and trends in CH<sub>4</sub> and CO loss.

90  
91 Combining machine learning, chemical transport model (CTM) output, and satellite data has the  
92 potential to constrain tropospheric column OH (TCOH). A variety of machine learning techniques, such  
93 as neural networks (Nicely et al., 2017; Nicely et al., 2020; Kelp et al., 2020), self-organizing maps  
94 (Stauffer et al., 2016), random forest regression (Keller and Evans, 2019), and gradient boosted  
95 regression trees (GBRTs) (Ivatt and Evans, 2020; Zhu et al., 2022a; Anderson et al., 2022) show promise in

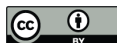

96 helping to solve problems in atmospheric chemistry. In particular, Zhu et al. (2022a) and Anderson et al.  
97 (2022) demonstrated the ability of GBRTs to predict OH from a chemical transport model with  
98 reasonable accuracy. GBRT models (Elith et al., 2008; Chen and Guestrin, 2016) use an ensemble of  
99 decision trees to predict the value of a target based on multiple inputs, even for targets with highly non-  
100 linear dependencies on the inputs.

101

102 Here, we present a methodology to infer clear sky TCOH in the tropics from space-based observations of  
103 its chemical and dynamical drivers with the goal of assessing the feasibility of our methodology,  
104 identifying potential limitations, and suggesting areas of improvement in the current observational  
105 network. We train a GBRT model using output from a simulation of the NASA GEOS (Goddard Earth  
106 Observing System) model, and then estimate TCOH in the actual atmosphere at the satellite overpass  
107 time using inputs from a suite of satellite retrievals. In Section 2, we describe the methodology for  
108 generating the machine learning model as well as the satellite retrievals used to constrain TCOH. We  
109 then evaluate the suitability of MERRA2 GMI as a training dataset (Sect. 3) and, in Section 4, present a  
110 satellite-constrained OH product for one month from each season. Finally, in Section 5, we explore  
111 potential methodological limitations and benefits, including lack of validation data, the impacts of  
112 observational uncertainties, and the ability to use different satellites and retrievals as inputs to the GBRT  
113 model.

114

## 115 **2 Description of the methodology to generate the GBRT model and of the associated datasets**

116 Our overall aim is to demonstrate the feasibility of our approach to constrain TCOH with satellite-based  
117 observations over broad regional scales. As a first step, we restrict our analysis to latitudes equatorward  
118 of 25° and regions over water. We chose to focus initially on this domain as it has appreciable OH  
119 concentrations and simplified chemistry, as compared to regions with large biogenic and anthropogenic  
120 VOC emissions. Nevertheless, this portion of the atmosphere accounts for 50 – 60% of global CO and  
121 CH<sub>4</sub> loss. In this section, we describe the creation of the machine learning model used to predict TCOH  
122 (Sect. 2.1) for this region as well as the satellite products used as inputs to the machine learning model  
123 (Sect. 2.2).

124

### 125 **2.1 Creation of the TCOH model**

#### 126 **2.1.1 Creation of the GBRT training dataset**

127 For the machine learning model training dataset, we use a subset of output from the MERRA2 GMI  
128 simulation (<https://acd-ext.gsfc.nasa.gov/Projects/GEOSCCM/MERRA2GMI/>). MERRA2 GMI is a 40 year  
129 (1980 – 2019) simulation of the NASA GEOS model run in replay mode (Orbe et al., 2017) with MERRA2  
130 (Modern Era Retrospective analysis for Research and Applications, version 2) meteorology (Gelaro et al.,  
131 2017). The simulation has a resolution of c180 on the cubed sphere (approximately 0.625° longitude by  
132 0.5° latitude) with 72 vertical layers and uses the Global Modeling Initiative (GMI) chemical mechanism  
133 (Duncan et al., 2007; Strahan et al., 2007). Output is available at daily- and monthly-averaged resolution,  
134 as well as instantaneous values corresponding with the overpass times of the satellites described in  
135 Section 2.2. Anderson et al. (2021) and Strode et al. (2019) provide detailed information about the  
136 simulation, including emissions.

137

138 The training target for the machine learning model is TCOH. In Anderson et al. (2022), we developed a  
139 GBRT parameterization trained on MERRA2 GMI output to predict in situ OH concentrations using 27  
140 inputs, only a small fraction of which are observable from space. That parameterization, designed to be  
141 integrated into the GEOS modeling framework, performed better when there was a separate model for  
142 each month as opposed to one model for all months. While that GBRT model is not appropriate for the  
143 application described here, we employ a similar approach, creating a separate set of TCOH training



144 targets for each month. We use instantaneous OH output from MERRA2 GMI at 14:00 local time for  
145 each day of a given month across the years 2005 to 2019, to correspond with the satellite record. We  
146 omitted data from 2017 to evaluate model performance. For a given month and year, we calculate daily  
147 tropospheric column values across the grid, filtering out columns where the maximum cloud fraction in  
148 that column was greater than 30%, yielding approximately 43,000 valid grid boxes per day. For each  
149 year, we then average these values to monthly resolution. This results in approximately 600,000 total  
150 training targets for each month over the 15-year period.

151  
152  
153

**Table 1:** Input variables to the machine learning model and the corresponding satellite retrieval used to create the satellite OH product.

| Variable                                                                                                                                            | Satellite retrieval        | Original horizontal and temporal resolution | Reference                   |
|-----------------------------------------------------------------------------------------------------------------------------------------------------|----------------------------|---------------------------------------------|-----------------------------|
| Total O <sub>3</sub> column                                                                                                                         | OMI TOMS-Like L3 version 3 | 0.25° × 0.25°, daily                        | McPeters et al. (2015)      |
| Tropospheric NO <sub>2</sub> column                                                                                                                 | OMI GSFC L3 version 4      | 0.25° × 0.25°, daily                        | Lamsal et al. (2021)        |
| CO column                                                                                                                                           | MOPITT L3 version 8        | 1.0° × 1.0°, monthly                        | Deeter et al. (2019)        |
| HCHO column                                                                                                                                         | OMI SAO L3 version 3       | 0.1° × 0.1°, daily                          | González Abad et al. (2015) |
| H <sub>2</sub> O <sub>(v)</sub> column                                                                                                              | AIRS L3 version 6          | 1.0° × 1.0°, monthly                        | Susskind et al. (2014)      |
| Sea surface temperature                                                                                                                             | MUR L4 version 4.2         | 0.25° × 0.25°, daily                        | Chin et al. (2017)          |
| Aerosol optical depth at 550 nm                                                                                                                     | MODIS Aqua L3 collection 6 | 0.5° × 0.5°, daily                          | Levy et al. (2013)          |
| H <sub>2</sub> O <sub>(v)</sub> layers: 925 – 850 hPa, 850 – 700 hPa, 700 – 600 hPa, 600 – 500 hPa, 500 – 400 hPa, 400 – 300 hPa, and 300 - 250 hPa | AIRS L3 version 6          | 1.0° × 1.0°, monthly                        | Susskind et al. (2014)      |
| Solar zenith angle                                                                                                                                  | N/A                        |                                             |                             |
| Latitude                                                                                                                                            | N/A                        |                                             |                             |

154  
155  
156  
157  
158  
159  
160  
161  
162  
163  
164  
165  
166

We selected the input variables for the machine learning model (Table 1) based on their relevance to OH chemistry and variability as well as our current ability to observe the variable with satellites. Performance was similar for a model including total column ozone only and for a model also including the tropospheric column. We therefore use total column ozone because of the uncertainties inherent in separating the column into two parts in the satellite retrieval. We chose the water vapor layers to correspond with the Atmospheric Infrared Sounder (AIRS) layers product. Layers are averages over the indicated pressure range, and we denote the layer names by the highest pressure in that range. We include sea surface temperatures (SST) as a proxy for the Indian Ocean Dipole and ENSO, which has a strong impact on OH variability in the tropics (Anderson et al., 2021; Turner et al., 2018). In addition, we include latitude and solar zenith angle as previous work has shown that these variables can explain a large fraction of the spatial OH variability (Duncan et al., 2000; Anderson et al., 2022).

167  
168  
169  
170  
171  
172

We sampled the MERRA2 GMI output to create the training dataset in the same manner as for the TCOH targets. The inputs to the machine learning model each correspond to the same model column as the OH target. All column values are instantaneous and taken from 14:00 to correspond with satellite overpass times, except for CO, which is for 10:00, corresponding with the Measurement of Pollution in the Troposphere (MOPITT) overpass time. Model performance was similar when using CO output at 14:00 and 10:00, likely because of limited diurnal variability in CO column in the study region. SSTs are

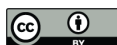

173 monthly averages of 24-hour averaged values, and we calculated solar zenith angle at the surface for  
174 noon on the 15<sup>th</sup> of a given month.

175

### 176 **2.1.2 Creation and tuning of the GBRT model**

177 We used the XGBoost package (Chen and Guestrin, 2016) version 0.81 in Python version 3.6 to create a  
178 GBRT model of TCOH for each month using the training datasets from MERRA2 GMI. For each month,  
179 we used 90% of the dataset for model training and the remainder for model validation. As mentioned in  
180 Section 2.1.1, we also used MERRA2 GMI output from 2017, which was omitted from the training  
181 dataset, as further validation.

182

183 To maximize parameterization performance while also balancing the potential of overfitting, we tuned  
184 hyperparameters, including the learning rate, the maximum tree depth, and the number of trees. We  
185 chose hyperparameter values that minimized the parameterization root mean square error (RMSE) of  
186 the training dataset. We set the learning rate, which controls the magnitude of change when adding a  
187 new tree, to 0.1, while we varied the maximum tree depth and number of trees from 6 to 22 and from  
188 10 to 150, respectively. For both maximum tree depth and number of trees, RMSE initially dropped  
189 significantly with increasing value, representing sharp improvement in parameterization performance.  
190 RMSE values eventually plateaued, increasing parameterization runtime without noticeably improving  
191 performance. A combination of a maximum tree depth of 18 and 100 trees balanced performance with  
192 model training and run time.

193

194 To determine whether the inputs to the machine learning model improved or hindered performance, we  
195 performed a “leave one out” analysis. Using 5-fold cross validation, we retrained the model, individually  
196 omitting each of the inputs, to determine the percent difference between the mean RMSE of the 5 folds  
197 for the model without a specific input and one including all inputs. Omitting the inputs listed in Table 1  
198 lead to increases in the RMSE, suggesting that each is necessary for improved model performance. As a  
199 result of this analysis, we do not use water vapor layers for pressures less than 300 hPa because these  
200 decreased model performance.

201

202 Finally, we found that it was not necessary to apply satellite averaging kernels and shape factors to the  
203 training dataset. Of the satellite retrievals used in this work (discussed in Sect. 2.2 and listed in Table 1),  
204 only CO, HCHO, and NO<sub>2</sub> could require convolving the model with the averaging kernel. Shape factors  
205 for the OMI NO<sub>2</sub> retrieval are determined from a similar setup of the GEOS model, also employing the  
206 GMI chemical mechanism and MERRA2 meteorology. Applying the satellite shape factors to the  
207 simulation discussed here would therefore not result in significant changes in the modeled NO<sub>2</sub>  
208 (Anderson et al., 2021). To test whether it is necessary to apply the averaging kernels for CO and HCHO,  
209 we created a separate training dataset, where we convolved the daily MERRA2 GMI output with the  
210 averaging kernel and a priori from the level 2 data for both species for February 2005 - 2019. All other  
211 inputs were kept the same. We then retrained the model with these adjusted CO and HCHO variables.  
212 When we applied the satellite data to the model for February 2017, as described in Section 4, the  
213 resulting TCOH differed by less than 1% on average from the model that did not include averaging kernel  
214 information. This level of uncertainty is significantly smaller than the other uncertainties discussed in  
215 Section 5, so we do not include averaging kernels in our analysis.

216

### 217 **2.2 Description of satellite products**

218 To create the observationally-constrained OH product, we use multiple satellite retrievals, listed in Table  
219 1 and briefly described here. For each satellite retrieval, we use the level 3 gridded product, with the  
220 exception of SST which is level 4. Where necessary, we regridded the retrieval to a common horizontal



221 grid with a resolution of  $1.0^\circ \times 1.0^\circ$  and averaged to the monthly scale. Each instrument is located  
222 onboard a polar orbiting satellite that provides near global coverage daily.  
223  
224 We use retrievals of three species – HCHO, O<sub>3</sub>, and NO<sub>2</sub> – from the Ozone Monitoring Instrument (OMI),  
225 an ultraviolet-visible spectrometer located onboard the Aura satellite, which has an overpass of  
226 approximately 13:30 local solar time (LST). We use the Smithsonian Astrophysical Observatory (SAO)  
227 version 3 HCHO retrieval (González Abad et al., 2015). Wolfe et al. (2019) found that this retrieval  
228 captured the variability of the HCHO columns in the remote atmosphere observed during the  
229 Atmospheric Tomography (ATom) campaign with little bias. For total column O<sub>3</sub>, we use the TOMS-like  
230 (Total Ozone Mapping Spectrometer) retrieval version 3 (McPeters et al., 2015), which agrees with  
231 ground-based and other satellite observations within approximately 1% (Labow et al., 2013). Finally, we  
232 use the Goddard Space Flight Center version 4 NO<sub>2</sub> retrieval (Lamsal et al., 2021). While previous  
233 studies have thoroughly evaluated this retrieval in more polluted atmospheres (e.g., Lamsal et al.,  
234 2014;Choi et al., 2020), evaluation in the remote tropical atmosphere, as defined in this study, is limited.  
235

236 For water vapor and aerosol optical depth (AOD) at 550 nm, we use retrievals from AIRS and the  
237 Moderate Resolution Imaging Spectroradiometer (MODIS) instruments, respectively, both located  
238 onboard the Aqua satellite with an overpass of approximately 13:30 LST. We use the total column water  
239 vapor standard physical retrieval as well as the 7 water vapor layers listed in Table 1 (Susskind et al.,  
240 2014). Multiple studies have evaluated the accuracy of the AIRS H<sub>2</sub>O<sub>(v)</sub> column and layers retrievals in  
241 the remote tropical atmosphere, finding bias of 5% or less and high correlation against both remote and  
242 *in situ* observations (Bedka et al., 2010;Anderson et al., 2016;Pérez-Ramírez et al., 2019). We use  
243 collection 6 of the dark target MODIS AOD retrieval at 550 nm, which is highly correlated with  
244 observations from the AERONET network over the ocean (Levy et al., 2013).  
245

246 We also use retrievals of CO from MOPITT, which is onboard the Terra satellite with an overpass of  
247 10:30 LST. We use the version 8 retrieval that includes both near and thermal infrared radiances (Deeter  
248 et al., 2019). CO retrievals from MOPITT in the remote tropics generally agree with ground-based  
249 remotely-sensed observations within 10% (Hedelius et al., 2019;Buchholz et al., 2017).  
250

251 Finally, we use SSTs from the Multi-scale Ultra-high Resolution (MUR) analysis, which combines  
252 nighttime SST observations from multiple satellite platforms, including MODIS, as well as *in situ*  
253 observations and agrees with other SST analyses within 0.36° C (Chin et al., 2017).  
254

### 255 **3 Evaluating the Suitability of the MERRA2 GMI Simulation as a Training Dataset**

256 Before generating the GBRT model to predict TCOH, we first demonstrate that the MERRA2 GMI  
257 simulation is suitable to use as a training dataset. Because of the paucity of *in situ* observations of OH  
258 over most of the globe, we necessarily use output from an atmospheric chemistry model to train the  
259 machine learning model. The atmospheric chemistry model output must reasonably capture the  
260 distribution, magnitude, and ENSO-related variability of OH and the drivers listed in Table 1, as GBRT  
261 models are unable to extrapolate beyond the photochemical environments on which they are trained  
262 (Anderson et al., 2022).  
263

#### 264 **3.1 Comparison of the Distribution and Magnitude of Simulated OH Drivers to Observations**

265 Simulated OH from MERRA2 GMI agrees with observations over the remote ocean within the  
266 instrumental uncertainty. Anderson et al. (2021) compared MERRA2 GMI output to *in situ* observations  
267 from the first two deployments of the Atmospheric Tomography mission (ATom), finding modest  
268 correlation ( $r^2$  values between 0.3 and 0.78 depending on the hemisphere and season) between





269 observations and the model. The average normalized mean bias was on the order of 20%, a slight high  
270 bias but within the  $2\sigma$  observational uncertainty of 35%. Agreement was highest in the remote  
271 atmosphere, whereas the largest error was in regions of fresh, continental outflow off the coasts of  
272 South America and New Zealand.  
273

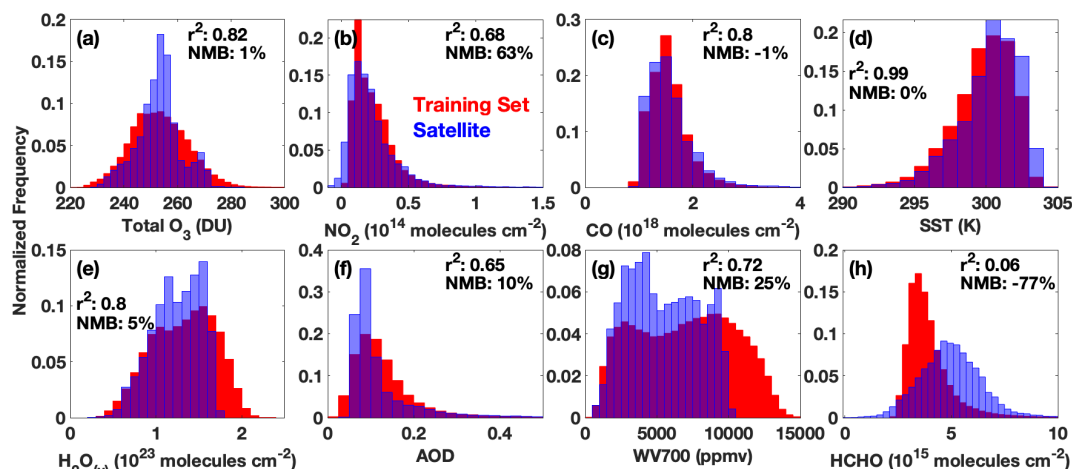

274  
275 **Figure 1:** Comparison of the normalized distributions of the training dataset (red) for the February model and  
276 satellite observations of the indicated species for February 2017 (blue). Purple indicates regions of overlap. We  
277 use  $\text{H}_2\text{O}_{(v)}$  at 700 hPa as an example for all  $\text{H}_2\text{O}_{(v)}$  layers. Distributions of the other  $\text{H}_2\text{O}_{(v)}$  layers are shown in Figure  
278 S1. We also indicate the  $r^2$  of the correlation between MERRA2 GMI output for February 2017 and the  
279 corresponding satellite retrieval as well as the normalized mean bias of that output.

280 The simulation captures both the observed variability and the magnitude of the majority of GBRT model  
281 inputs with reasonable fidelity, suggesting that the satellite retrievals highlighted in Section 2.2 are  
282 suitable inputs for a machine learning model trained on MERRA2 GMI output (Fig.1). Figure 1 compares  
283 the distribution of the February training dataset created from the MERRA2 GMI simulation for 2005 –  
284 2019 to the satellite observations of the indicated species for February 2017, a month omitted from the  
285 training dataset. Distributions of the remaining water vapor layers are shown in Figure S1. In addition,  
286 correlations between observations and MERRA2 GMI output for February 2017 are shown, as an  
287 example, in Figures S2 and S3. With the exception of HCHO, distributions of the species are similar  
288 between the observations and MERRA2 GMI, with the training dataset encompassing the full range of  
289 almost all species. A GBRT model trained on MERRA2 GMI will therefore likely not have to extrapolate  
290 to photochemical environments on which it was not trained when applied to the satellite data. Further,  
291 MERRA2 GMI total column  $\text{O}_3$ ,  $\text{H}_2\text{O}_{(v)}$  column, AOD, CO, and SSTs are all highly correlated ( $r^2$  of 0.65 or  
292 higher) with their respective satellite observations, and biases are within 10%, on average. Anderson et  
293 al. (2021) did show that MERRA2 GMI CO columns demonstrate biases of opposite sign in the Northern  
294 and Southern Hemispheres, however.  
295

296 Agreement between MERRA2 GMI and satellite observations for  $\text{NO}_2$ , HCHO, and the  $\text{H}_2\text{O}_{(v)}$  layers is  
297 more variable than for the other species. While modeled  $\text{NO}_2$  is moderately correlated with  
298 observations ( $r^2 = 0.68$ ) with relatively similar distributions, MERRA2 GMI has a NMB of 63%. This  
299 disagreement is most pronounced at low column values, however, where observational uncertainty is  
300 large. Further, Anderson et al. (2021) demonstrated distinct regions of bias in  $\text{NO}_2$  related to biomass  
301 burning and lightning emissions. Modeled HCHO, on the other hand, is not correlated with observations



302 and is biased low by -77%. Modeled water vapor layers are all modestly correlated with observations ( $r^2$   
303 of 0.64 or greater) but vary in their bias, with the 925, 850, 700, and 300 hPa layers biased within 30%  
304 and the remaining layers biased up to 71%.

305  
306 The satellite product is insensitive to the differences between the HCHO distribution of the satellite and  
307 training dataset highlighted in Figure 1. To determine the effects of the difference in HCHO distribution,  
308 we extended the training dataset to cover the full time period of the MERRA2 GMI simulation (1980 –  
309 2019) and then subsampled the resultant data to match the satellite HCHO distribution. Extending the  
310 training dataset to 1980 allows for the subsampled training dataset to have a similar size (~600,000  
311 points) as the original training set. We then created a new machine learning model using this sub-  
312 sampled dataset and calculated OH fields for Feb. 2017 using the satellite inputs from Table 1. We  
313 compared this to the TCOH field calculated from a model using the original training dataset, finding  
314 agreement within 5%. This uncertainty is small in comparison to that resulting from uncertainties in the  
315 NO<sub>2</sub> and HCHO satellite retrievals discussed in Section 5.2. If the uncertainty of the satellite inputs  
316 decreases, as retrievals and instruments improve, then it will become necessary to more closely align  
317 the training and observed HCHO distributions.

318  
319 Finally, because NO<sub>2</sub> and HCHO have the largest differences between satellite observations and the  
320 training dataset, we trained a separate machine learning model to predict TCOH, omitting these two  
321 species as inputs. When this model was evaluated using the independent MERRA2 GMI output  
322 described in Section 4.1, the NRMSE was 10.1%, a more than factor of 2 degradation in performance as  
323 compared to the baseline model. This suggests that omitting these species from the machine learning  
324 model would result in a greater uncertainty in the final TCOH product than that which results from the  
325 retrieval uncertainties and the potential discrepancies between observations and the training dataset.

### 326 327 **3.2 Evaluation of the simulated ENSO-related variability of OH drivers**

328 Because ENSO is the dominant mode of OH variability (Anderson et al., 2021; Turner et al., 2018), the  
329 training dataset must also capture the ENSO-related variability of the GBRT model inputs. Anderson et  
330 al. (2021) demonstrated that the correlation of columns of CO, H<sub>2</sub>O<sub>(v)</sub>, and to a lesser extent NO<sub>2</sub>, from  
331 the MERRA2 GMI simulation with the Multivariate ENSO Index (MEI) (Wolter and Timlin, 2011) agreed  
332 closely with correlations of the corresponding species for observations from MOPITT, AIRS, and OMI.  
333 Unsurprisingly, based on the strong correlation and low bias of MERRA2 GMI SSTs with observations, the  
334 simulation also captures the relationship between SSTs and ENSO. The simulation therefore sufficiently  
335 captures the ENSO-related variability of these species to act as training data for the GBRT model. We  
336 now evaluate this relationship for the remaining GBRT model inputs.

337  
338 The MERRA2 GMI-simulated ENSO-related variability of AOD and the various water vapor layers also  
339 agrees well with observations. Figures 2 and S4 show the correlation of AOD, HCHO, and the various  
340 H<sub>2</sub>O<sub>(v)</sub> layers with the MEI for the satellite retrievals and MERRA2 GMI. MERRA2 GMI captures the  
341 general distribution and magnitude of correlation between AOD and ENSO, despite the low optical  
342 depths over much of the domain. There are some regional differences, however, particularly in the  
343 eastern Southern Hemispheric Pacific. For the H<sub>2</sub>O<sub>(v)</sub> layers, the simulation underestimates the  
344 magnitude of the correlation in some areas, but in general, there is excellent agreement for all layers  
345 throughout the troposphere. This suggests that, despite the high bias discussed above, including the  
346 H<sub>2</sub>O<sub>(v)</sub> layers could provide important, vertically-resolved information to the machine learning model.

347  
348 Modeled accuracy of the HCHO-ENSO relationship is more difficult to assess. While both the OMI  
349 retrieval and MERRA2 GMI demonstrate broad regions of anti-correlation between HCHO and ENSO, the





350 correlations with OMI HCHO are weaker and noisier than for the other satellite retrievals. Over much of  
351 the domain, HCHO abundance is low, often at or below the retrieval detection limit, suggesting that the  
352 HCHO retrieval might not be of sufficient quality to capture ENSO-related variability. We investigate the  
353 impacts of the HCHO observational uncertainty in Section 5.  
354

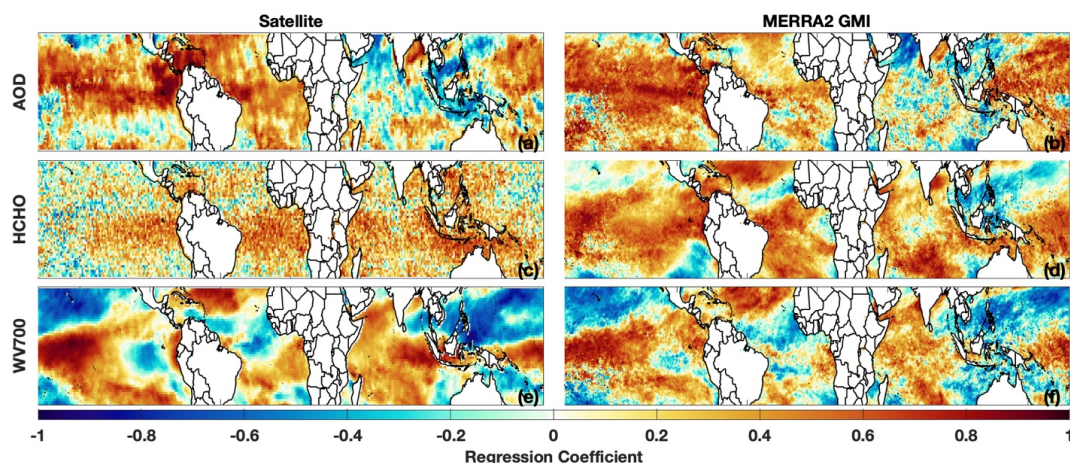

355 **Figure 2:** Distribution of the regression coefficient of a linear least squares fit of the indicated variable against the  
356 MEI for the respective satellite retrieval (a, c, and e) and MERRA2 GMI (b,d, and f) for February. Regressions of  
357 AOD are for 2010 to 2019, the years for which we have a one-degree, gridded satellite product, while HCHO and  
358 water vapor 700 hPa are for 2005 to 2019. Satellite data are on a  $1^\circ \times 1^\circ$  grid while model output is at the native  
359 model resolution.  
360

361 Finally, because we use total column  $O_3$  as an input to the GBRT model, we do not evaluate the  
362 relationship between ENSO and  $O_3$ , as the stratosphere dominates the  $O_3$  column and the ENSO-related  
363 variability is mostly confined to the troposphere. Oman et al. (2013) found that a GEOS CCM simulation  
364 and a combination of  $O_3$  retrievals from the Microwave Limb Sounder (MLS) and the Tropospheric  
365 Emission Spectrometer (TES) exhibited similar ENSO-related variability in the middle and upper  
366 troposphere, demonstrating that simulations in the GEOS framework can capture this relationship. If a  
367 TES-like satellite retrieval were currently available, it could be a valuable contributor to the GBRT model  
368 described here, as it would provide vertically-resolved information about one of the primary drivers of  
369 OH production.  
370

#### 371 **4 Tropical tropospheric column OH constrained with observations of its drivers**

372 We now demonstrate the ability of the GBRT model to determine TCOH. First, we show that the GBRT  
373 model can reproduce MERRA2 GMI modeled TCOH from a year independent of the training dataset, a  
374 so-called “hold out set” (Sect. 4.1). We then input satellite data from one month from each season into  
375 the GBRT model to evaluate the realism of the calculated TCOH fields (Sect 4.2).  
376

##### 377 **4.1 Evaluation with an independent year from MERRA2 GMI**

378 The machine learning model is able to capture both the magnitude and the variability of TCOH across  
379 each season when applied to MERRA2 GMI output from 2017, a year independent of the training  
380 dataset. For August 2017 (Fig. 3b), the predicted TCOH is highly correlated with MERRA2 GMI ( $r^2$  of  
381 0.98). TCOH from the machine learning model agrees with the CTM simulation within 4.8% on average.  
382 The overall normalized mean bias (NMB) is negligible (-0.1%), although there are some regions of



383 coherent bias (Fig. 3a). Results are similar for February, May, and October 2017 (Fig. S5). The  
384 normalized root mean square error for each of these months is comparable to that found for a GBRT  
385 parameterization of OH created with a similar methodology that included 27 inputs (Anderson et al.,  
386 2022). This suggests that limiting inputs to model variables observable from space does not degrade the  
387 ability of the machine learning model to predict TCOH. The low bias and high correlation between the  
388 GBRT and MERRA2 GMI TCOH for all four months examined here also suggests that any potential  
389 overfitting by the GBRT model is minimal.

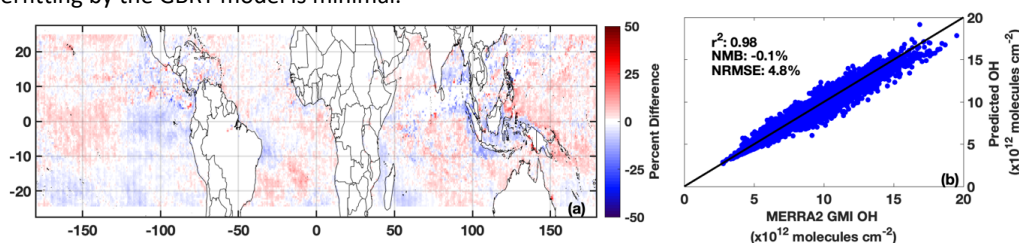

390  
391 **Figure 3:** Percent difference between TCOH predicted by the machine learning model and that from MERRA2 GMI  
392 for August 2017, a month and year omitted from the training dataset (a). A regression of the machine learning TCOH  
393 against MERRA2 GMI for the same month (b). The  $r^2$  of a linear, least squares regression, along with the normalized  
394 mean bias (NMB) and normalized root mean square error (NRMSE), are also indicated.

#### 395 4.2 TCOH from satellite observations of its drivers

396 We now apply satellite data from the four months corresponding to the ATom campaign (Aug. 2016,  
397 Feb. 2017, Oct. 2017, and May 2018) to the GBRT model to determine TCOH fields across the tropics.  
398 More details about ATom as well as evaluation of the GBRT model with ATom observations are in  
399 Section 5. We use the satellite observations listed in Table 1, all of which have been averaged to the  
400 monthly scale and to a  $1^\circ \times 1^\circ$  horizontal resolution. We include only grid boxes with observations for  
401 all GBRT model inputs and where those observations are within the range of the corresponding inputs  
402 from the training dataset. Because the satellite inputs for most species exclude grid boxes with a cloud  
403 fraction greater than approximately 30%, the product presented here represents predominantly clear  
404 sky conditions.

405  
406 The GBRT model and multi-satellite inputs yield TCOH fields that are geophysically credible based on our  
407 current understanding of OH photochemistry. Although the domain-wide average changes little with  
408 season, with a minimum of  $5.84 \times 10^{12}$  molecules/cm<sup>2</sup> in May 2018 and a maximum of  $6.35 \times 10^{12}$   
409 molecules/cm<sup>2</sup> in August 2016, the spatial distribution varies widely among the four months (Fig. 4). In  
410 both Feb. 2017 and Aug. 2016, TCOH minimizes in the winter hemisphere, consistent with lower OH  
411 production due to low insolation. The reverse is true for the summer hemisphere. In addition, TCOH  
412 maximizes in regions with strong continental outflow and along coastlines, regions likely to be impacted  
413 by anthropogenic and biomass burning emissions of OH drivers.

414  
415 In general, TCOH from the multi-satellite product differs in both magnitude and distribution from the  
416 MERRA2 GMI simulation. For example, for Feb. 2017, mean MERRA2 GMI TCOH is  $6.96 \times 10^{12}$   
417 molecules/cm<sup>2</sup>, 12% higher than the satellite product (Fig. S6). This is consistent with the comparison to  
418 *in situ* observations discussed in Section 3.1 where MERRA2 GMI overestimates ATom observations by  
419 ~20% and underestimates CH<sub>4</sub> lifetime, suggesting that the satellite product is again of reasonable  
420 magnitude. While understanding the satellite/model differences is beyond the scope of this work, we  
421 consider the variety in TCOH spatial distributions generated by the GBRT model to be promising. The  
422 difference between the satellite-constrained product and MERRA2 GMI lends some confidence that the  
423 GBRT model is not overfit or “tied” to geographic determiners in the training dataset, but rather, is



424 sensitive to variations in the chemical and dynamical drivers of OH. These results all suggest that the  
425 methodology presented here can produce a reasonable satellite TCOH product in the tropics, with  
426 values and distributions independent of the chemistry model used to create the GBRT model.  
427

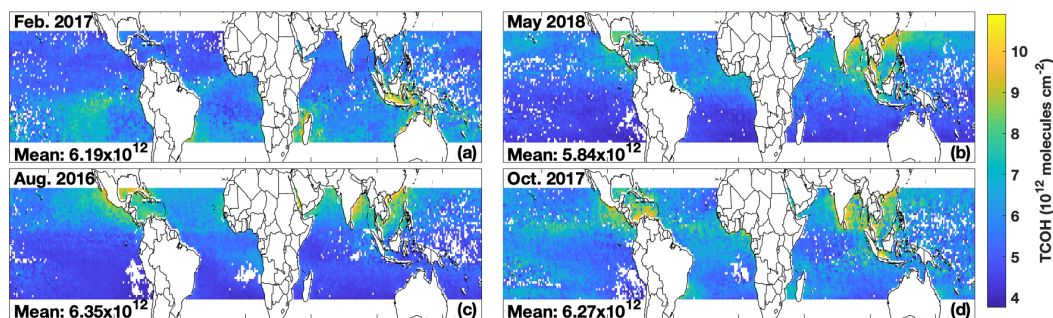

428  
429 **Figure 4:** TCOH calculated with the machine learning model using satellite inputs for the months of each ATom  
430 deployment: Feb. 2017 (a), May 2018 (b), Aug. 2016 (c), and Oct. 2017 (d). The mean, domain-wide TCOH value in  
431 molecules/cm<sup>2</sup> for each month is also indicated.

## 432 5 Understanding and mitigating potential challenges in using this methodology to constrain TCOH

433 In this section, we outline possible limitations of the machine learning methodology and the current  
434 observational network of the GBRT model inputs and provide potential means to mitigate these  
435 limitations where necessary. In section 5.1, we discuss the current lack of sufficient in situ observations  
436 to thoroughly evaluate the methodology, highlighting this point by validating the GBRT model with data  
437 from the ATom campaign. In section 5.2, we investigate the impacts of random retrieval errors in  
438 satellite retrievals on the TCOH product, while in section 5.3, we evaluate the impacts on TCOH when  
439 using different satellite retrievals as inputs.

440

### 441 5.1 Insufficient in situ observations for thorough independent evaluation

442 While we demonstrated in Section 4.1 that TCOH calculated with the GBRT model agrees closely with a  
443 hold-out set from MERRA2 GMI, it is also important to demonstrate that the GBRT model can replicate  
444 observed TCOH from the actual atmosphere. Because the satellite TCOH product shown in Figure 4 is  
445 monthly and at a 1° × 1° resolution, however, there are no observations with which to evaluate the  
446 product. We can test the ability of the GBRT model to reproduce observed TCOH from field campaigns,  
447 however, assuming there are concomitant observations of the input species listed in Table 1. The  
448 additional need for tropospheric column values of many of these species severely limits the datasets  
449 available for validation. To our knowledge, the ATom campaign is the only source of the required inputs  
450 with enough observations to attempt a limited validation.

451

452 During ATom (Thompson et al., 2022), scientists measured a suite of air quality and climate relevant  
453 trace gases and aerosols throughout the atmosphere above the remote Pacific and Atlantic. ATom took  
454 place in four parts: ATom 1 (July – August 2016), ATom 2 (January – February 2017), ATom 3 (September  
455 – October 2017), and ATom 4 (April – May 2018). During each deployment, flights consisted of a series  
456 of ascents and descents across all tropical latitudes over the Pacific and Atlantic Oceans. This allows for  
457 the calculation of tropospheric column content of the observed species and evaluation of the machine  
458 learning model across most latitudes of our study domain and across all seasons.

459

460 To evaluate the GBRT model performance, we calculated TCOH using the GBRT model and observations  
461 from the ATom deployments as inputs. We then compared the values to the observed OH columns. To



462 calculate the column values from the observations, we averaged data into 25 hPa pressure bins for each  
463 ATom profile. We filled in missing data using a log-linear interpolation and then integrated the column.  
464 Our analysis here includes only profiles with observations of all necessary species, that spanned at least  
465 700 hPa, and where less than 25% of the pressure bin values were interpolated. We also omitted any  
466 profiles that had pressure bins with negative OH values. In addition, we restrict our analysis to latitudes  
467 within 25° of the equator and profiles conducted between 12:00 and 15:00 LST. Values for total column  
468 O<sub>3</sub>, AOD, and SSTs, for which there were no observations during ATom, were taken from the MERRA2  
469 GMI simulation from the grid box closest to the center of the respective profile. The spatial distribution  
470 of the valid ATom columns and the corresponding columns calculated with the GBRT model are shown  
471 in Figure S7.  
472

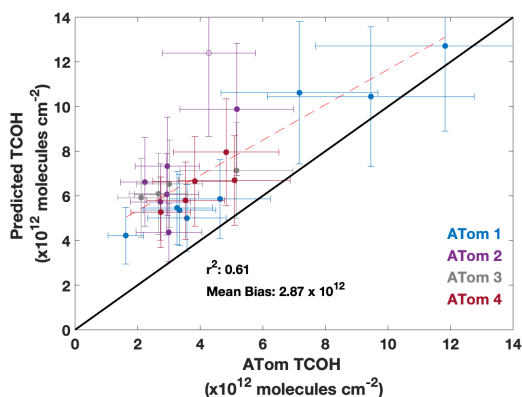

473  
474 **Figure 5:** Regression of TCOH observed from the ATom deployments against that predicted from the GBRT model.  
475 Error bars represent the 2 $\sigma$  observational uncertainty as reported in Brune et al. (2020) and the GBRT uncertainty  
476 described in Section 5.2. The  $r^2$  of a linear least squares fit and the mean bias is also shown.

477 The GBRT model captures the variability of the observed TCOH although there is a consistent high bias.  
478 When applied to all ATom deployments, predicted TCOH is correlated with the observations with an  $r^2$   
479 of 0.61 and a mean bias of  $2.67 \times 10^{12}$  molecules/cm<sup>2</sup> (Fig.5). Despite the high bias, many of the data  
480 points agree within the combined modeled and observational uncertainty. The  $r^2$  value is heavily driven  
481 by one outlier from the ATom 2 campaign (open circle), which, when removed, increases the  $r^2$  to 0.78.  
482 Likewise, there is variability in the correlation among the deployments, ranging from 0.94 for ATom 1  
483 and 3 to 0.57 for ATom 2. The level of agreement between observed and predicted OH, particularly for  
484 ATom1 and 3, is comparable or better than that of other methods to infer OH from space. For example,  
485 Pimlott et al. (2022) found an  $r$  of 0.78 ( $r^2 = 0.61$ ) when estimating ATom OH using a steady state  
486 approach, with  $r$  values ranging from 0.51 to 0.85 ( $r^2$  of 0.26 to 0.72) for the different deployments. The  
487 level of agreement we show here therefore demonstrates the validity of the machine learning method  
488 to capture the variability of OH.

489  
490 The source of the constant high bias, equal almost to a factor of 2 overestimate at the lowest column  
491 values, is unclear, although there are multiple potential error sources. For example, a typical profile  
492 taken during ATom spanned 300 – 400 km in latitude, disconnecting the top and bottom of the profile in  
493 space. This is in contrast to the data used to train the model, which were vertical columns over one  
494 location. This could lead to a degradation in model performance when applied to ATom, since the  
495 columns are not directly analogous to the training dataset. These effects are likely limited because  
496 ATom observations are in the remote atmosphere, where the spatial distribution of relevant species is





497 likely to be more homogeneous than over land. Likewise, in most cases, ATom columns do not span the  
498 entire troposphere. While this is unlikely to consistently result in large errors, if a large fraction of the  
499 tropospheric column of one input was outside the range of the ATom profile, this would likely cause  
500 large errors in calculated TCOH.

501

502 Further, there is a known interference with the ATom NO<sub>2</sub> observations. Because of thermal  
503 degradation of NO<sub>2</sub> reservoir species, such as organic nitrates and peroxyacetyl nitrate, in the  
504 instrument inlet, NO<sub>2</sub> observations are likely biased high (Shah et al., 2022;Thompson et al.,  
505 2022;Silvern et al., 2018). Recalculating the TCOH from ATom with NO<sub>2</sub> from a box model constrained  
506 with NO observations with a setup similar to that described in Nicely et al. (2016) yields a similar  
507 correlation (Fig. S8) as that shown in Figure 5 but with a lower slope, leading to underestimates at  
508 higher column values. The uncertainty in observed NO<sub>2</sub> could explain some of the scatter seen in Figure  
509 5. For more certain evaluation with observations, greater certainty in the in situ NO<sub>2</sub> observations is  
510 needed. Although the in situ observations are insufficient to evaluate the absolute accuracy of the  
511 product, the results presented here demonstrate that a machine learning model trained on data from a  
512 CTM simulation can capture TCOH variability in the actual atmosphere.

513

## 514 **5.2 Impacts of uncertainties in the satellite retrievals on TCOH**

515 In the remote atmosphere where HCHO and NO<sub>2</sub> abundances are low, retrieval uncertainty of an  
516 individual pixel for both species can be on the order of 100% and is often reflective of the *a priori*  
517 (González Abad et al., 2015;Lamsal et al., 2021). Given the importance of these species to the GBRT  
518 model as well as to OH chemistry, it is necessary to determine how the propagation of the retrieval  
519 uncertainties from these and other model inputs impacts the predicted TCOH.

520

521 We determined the total uncertainty in TCOH from all inputs as well as the resultant uncertainty from  
522 each individual input for Feb. 2017. First, we estimated an average retrieval uncertainty for each input  
523 based on reported values in the retrieval files or from the literature (Table S1). We note that for NO<sub>2</sub>  
524 and HCHO we use a fit uncertainty for a single retrieval. Because we are using monthly-averaged data at  
525 1° × 1° horizontal resolution, this likely significantly overestimates the actual uncertainty in these  
526 retrievals as the random error from individual pixels will tend to cancel when averaged over such large  
527 and spatial temporal scales. Our results are therefore an upper bound on the estimated TCOH  
528 uncertainty.

529

530 Next, for each grid box and model input, we created a Gaussian distribution of 2000 values with the  
531 modeled value for Feb. 2017 as the mean and the estimated uncertainty as the standard deviation. For  
532 each input, we then ran the GBRT model 2000 times to create a distribution of predicted TCOH values  
533 for each grid box. The normalized uncertainty in TCOH attributable to a given input is the ratio of the  
534 standard deviation of the resultant distribution divided by the mean value. We repeated this process  
535 individually for all inputs. In addition, to estimate a total uncertainty in TCOH, we varied all inputs  
536 simultaneously with the same Gaussian distributions described above.

537

538 Uncertainty from the NO<sub>2</sub> retrieval, and to a lesser extent HCHO, dominates the total uncertainty in the  
539 TCOH product but is of a magnitude comparable to that of in situ OH observations. Median TCOH 1σ  
540 uncertainty resulting from NO<sub>2</sub> is 16.5%, with maxima in the remote atmosphere in regions where NO<sub>2</sub>  
541 columns are low. Median uncertainty in TCOH resulting from HCHO is 7%, averaged over the study  
542 domain, despite the large uncertainty in the HCHO retrieval itself. In contrast to NO<sub>2</sub>, uncertainties  
543 maximize in regions with higher HCHO columns (Fig. 6), although this is likely an overestimate as the  
544 retrieval uncertainty for these columns is lower than in the more remote atmosphere. In comparison,



545 median TCOH uncertainties resulting from other inputs are 2.9% or less (Figs. S9 and S10). Total TCOH  
546 uncertainty is 16.6% and is dominated by the NO<sub>2</sub> uncertainty.  
547

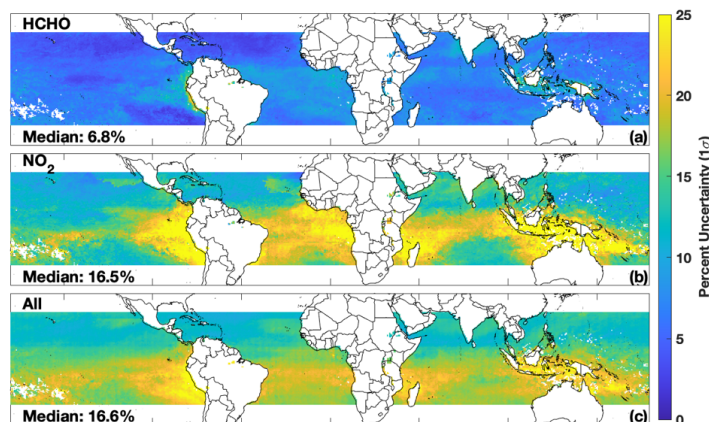

548 **Figure 6:** Normalized  $1\sigma$  uncertainty in the satellite TCOH product due to uncertainties in the HCHO (a) and NO<sub>2</sub>  
549 (b) retrievals. The combined uncertainty from all input species is shown in panel c.  
550

551 These results demonstrate that the satellite retrieval inputs to the machine learning model are of  
552 sufficient quality to produce a meaningful TCOH data product when averaged over large spatial and  
553 temporal scales. The  $2\sigma$  uncertainty in TCOH resulting from the uncertainties in these retrievals is on  
554 the order of that reported for in situ OH observations (Brune et al., 2020). As discussed earlier, this is  
555 also likely an upper bound on the uncertainty from random retrieval errors, and uncertainties could be  
556 reduced through further averaging, although at the expense of reduced spatial and temporal resolution.  
557 Improving the satellite retrievals of NO<sub>2</sub> and HCHO in the remote atmosphere, using retrievals with less  
558 noise over the remote atmosphere such as HCHO from the Ozone Mapping and Profiler Suite (OMPS)  
559 (González Abad et al., 2016), or incorporating data from satellites with higher resolution, such as  
560 TROPOMI (Tropospheric Monitoring Instrument), could also reduce the uncertainty in their retrievals  
561 and thus in TCOH. As discussed in the next section, however, systematic biases between satellite  
562 retrievals can also lead to uncertainties in the TCOH.  
563

### 564 5.3 Sensitivity of TCOH to different satellite retrievals of GBRT inputs

565 The satellite retrievals listed in Table 1 provide the benefit of a long record, with data from most  
566 retrievals available from at least 2005 to the present. Such a rich dataset would allow for long-term  
567 trend analysis of TCOH. These instruments are near the end of their life cycle, however, so it is  
568 instructive to see how retrievals from newer satellites impact the predicted TCOH from the GBRT model.  
569 In addition, although these newer satellites, such as TROPOMI, have a significantly shorter observational  
570 record than those in Table 1, TROPOMI also has finer spatial resolution and the added advantage of  
571 providing retrievals for CO, NO<sub>2</sub>, O<sub>3</sub>, HCHO, and H<sub>2</sub>O<sub>(v)</sub>. Using retrievals of multiple species from the  
572 same instrument could negate errors resulting from differences in viewing geometry as well as from  
573 overpass time. Here, we investigate the effects of applying retrievals from TROPOMI to the machine  
574 learning model and compare them to the results from the product described in Section 4, highlighting  
575 potential impacts resulting from instrumental differences as well as those resulting from differences in  
576 retrieval algorithms. The results emphasize the need for thorough retrieval validation in the remote  
577 atmosphere, particularly of NO<sub>2</sub>.  
578





### 579 5.3.1 Description of TROPOMI

580 TROPOMI, a successor instrument to OMI, is a spectrometer covering portions of the ultraviolet, visible,  
581 and infrared spectrum (Veefkind et al., 2012). It is located onboard the Sentinel 5 Precursor satellite,  
582 which is polar orbiting and has a local overpass time of approximately 13:30. Horizontal resolution for  
583 the month examined here (May 2018) is 7 km × 3.5 km at nadir. We have gridded the Level 2 product  
584 for each species to a 1° × 1° resolution and averaged the data to the monthly scale, applying the  
585 recommended quality flags and filtering for cloud fraction greater than 30%.

586  
587 We use two different retrievals of TROPOMI NO<sub>2</sub> for this analysis. First, we use the KNMI (Royal  
588 Netherlands Meteorological Institute) NO<sub>2</sub> retrieval (van Geffen et al., 2020), which is based on the  
589 DOMINO (Dutch OMI NO<sub>2</sub> product) retrieval developed for the OMI instrument. Wang et al. (2020)  
590 found that this retrieval was biased high when compared to ship-based observations from a MAX-DOAS  
591 instrument over the remote oceans. In addition, we use the MINDS (Multi-Decadal Nitrogen Dioxide  
592 and Derived Products from Satellites) retrieval, which uses the same algorithm as for the OMI product  
593 described in Section 2 (Lamsal et al., 2022). This retrieval has not been evaluated in the remote tropics.

594  
595 We also use TROPOMI retrievals of HCHO, H<sub>2</sub>O<sub>(v)</sub>, total column O<sub>3</sub>, and CO. The HCHO retrieval (De  
596 Smedt et al., 2018) was found to have a 30% low bias with respect to an OMI retrieval using the same  
597 algorithm due to differences in cloud processing (De Smedt et al., 2021). While evaluation in the remote  
598 tropics is limited, the TROPOMI retrieval does overestimate HCHO in polluted regions (De Smedt et al.,  
599 2021) when compared to ground-based observations. The TROPOMI H<sub>2</sub>O<sub>(v)</sub> (Chan et al., 2022) retrieval  
600 has a slight dry bias with comparison to other satellite products, while the total column O<sub>3</sub> retrieval  
601 (Garane et al., 2019) agrees within 0 – 1.5% with ground-based observations. Finally, the CO retrieval  
602 (Borsdorff et al., 2019) agrees with MOPITT over the oceans within 3% on average (Martínez-Alonso et  
603 al., 2020). TROPOMI does not have an equivalent retrieval of the AIRS H<sub>2</sub>O<sub>(v)</sub> layers.

### 604 605 5.3.2 TROPOMI data applied to the GBRT model

606 First, we calculate TCOH for May 2018 using inputs from TROPOMI. We trained a separate machine  
607 learning model using all inputs from Table 1 except the water vapor layers, for which there are no  
608 TROPOMI retrievals. Removal of the layers from the machine learning model does not significantly  
609 degrade performance. For example, for May 2017, removing the H<sub>2</sub>O<sub>(v)</sub> layers from the model, increases  
610 the NRMSE from 5.34% to 5.73% when applying the GBRT model to the hold out set. For this new  
611 model, we then calculate TCOH using TROPOMI data, including the KNMI NO<sub>2</sub> retrieval. For SSTs and  
612 AOD, we use the MUR and MODIS products respectively. While TROPOMI does have an aerosol  
613 product, the UV aerosol index, the corresponding output from the MERRA2 GMI simulation is  
614 unavailable. We refer to this as the TROPOMI-KNMI product. We have also calculated TCOH using the  
615 satellite retrievals in Table 1, except for the water vapor layers, using this GBRT model, and refer to that  
616 as the OMI/MOPITT/AIRS product.

617  
618 TCOH from the TROPOMI-KNMI product are biased high with respect to those from the  
619 OMI/MOPITT/AIRS product. Figure 7 shows TCOH calculated from the TROPOMI-KNMI product as well  
620 as the percent difference between the two products. While there is modest correlation between the  
621 two ( $r^2 = 0.63$ ), the TROPOMI product is 27.6% higher than the multi-satellite product, with  
622 overestimates across almost the entire domain. Differences between the products are most  
623 pronounced in the Indian Ocean and off the coasts of Indonesia and the Philippines.

624  
625 In general, observations from TROPOMI agree with those from the satellites in Table 1, with the  
626 exception of NO<sub>2</sub> and HCHO. Ozone, H<sub>2</sub>O<sub>(v)</sub>, and CO from TROPOMI are highly correlated ( $r^2$  of 0.85 or



627 higher) with their respective retrievals from the OMI/MOPITT/AIRS product, with a modest high bias  
628 (less than 10%) in each case (Fig. S11). Note that we do not seek to identify the more accurate retrievals  
629 here; we are reporting the bias with respect to the satellite products listed in Table 1 because those  
630 retrievals underlie the TCOH product. TROPOMI NO<sub>2</sub> and HCHO, on the other hand, are systematically  
631 biased with respect to their respective OMI products, with a distinct high bias in KNMI-NO<sub>2</sub> (145%) and  
632 low bias in HCHO (20%). The higher TCOH from the TROPOMI product is consistent with the increase in  
633 NO<sub>2</sub>, which would lead to higher secondary production of OH. Further, while TROPOMI KNMI-NO<sub>2</sub> is  
634 modestly correlated with OMI NO<sub>2</sub> ( $r^2 = 0.61$ ), TROPOMI and OMI HCHO are not correlated ( $r^2 = 0.23$ ),  
635 highlighting the difficulty of the HCHO retrieval.  
636

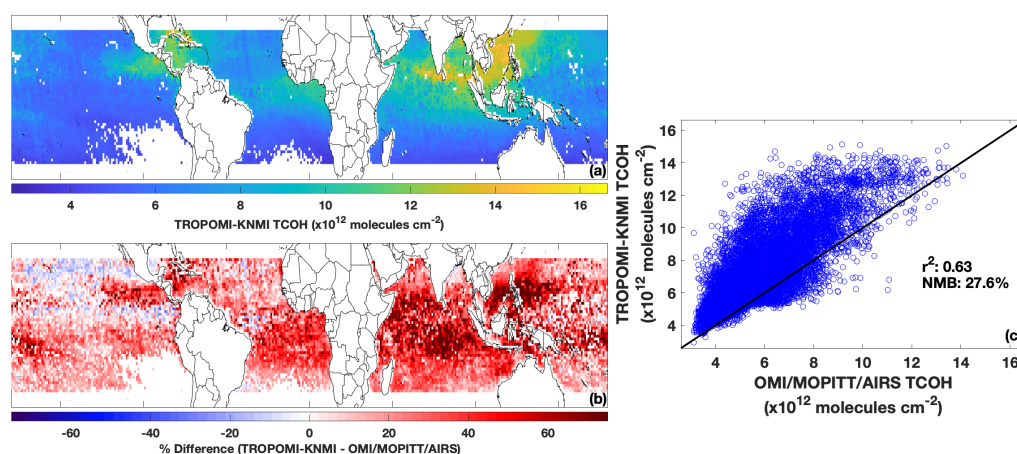

637  
638 **Figure 7:** TCOH for May 2018 determined using TROPOMI inputs, including the KNMI NO<sub>2</sub> retrieval (a). The  
639 difference between the TROPOMI and multi-satellite product is shown in (b). Panel (c) shows the regression of  
640 TCOH calculated from TROPOMI against that calculated from retrievals from MOPITT, OMI, and AIRS.

641 NO<sub>2</sub> drives the differences between the two TCOH products. To determine the impacts of the different  
642 TROPOMI inputs on the TCOH product, we individually swapped each TROPOMI input into the  
643 OMI/MOPITT/AIRS product, replacing the corresponding input from Table 1. We then determined the  
644 difference in TCOH from the OMI/MOPITT/AIRS product that does not include TROPOMI. While this  
645 method will not yield the exact contribution from a particular retrieval because of the non-linear nature  
646 of OH chemistry, it does yield information about the relative importance of each species. Swapping in  
647 TROPOMI CO, H<sub>2</sub>O<sub>(v)</sub>, and O<sub>3</sub> changed TCOH by less than 2%, while using TROPOMI HCHO increased  
648 TCOH by 3%. In contrast, TROPOMI NO<sub>2</sub> increased TCOH by 29%, showing that the high bias in the  
649 TROPOMI TCOH product is dominated by differences in NO<sub>2</sub>.

650  
651 The increased TCOH in the TROPOMI product likely results from a combination of differences in the NO<sub>2</sub>  
652 retrieval algorithm as well as instrumental differences. Comparison of the KNMI and MINDS retrievals  
653 illustrate this point. When compared to OMI, the MINDS NO<sub>2</sub> retrieval has a NMB of 58% for May 2018,  
654 as compared to a NMB of 145% for the KNMI retrieval. The closer agreement is unsurprising since the  
655 MINDS NO<sub>2</sub> uses the same retrieval algorithm as for OMI. Substituting the MINDS NO<sub>2</sub> as an input to the  
656 TROPOMI product (TROPOMI-MINDS product) reduces the bias with respect to the OMI/MOPITT/AIRS  
657 product to 18% (Fig. S12). While this is an improvement in agreement, the differences in TCOH as well  
658 as the lack of change in  $r^2$  value still suggest that differences between OMI and TROPOMI unrelated to  
659 the retrieval algorithm account for some of the discrepancy.



660

661 The results here demonstrate the sensitivity of the methodology to any systematic bias in the input  
662 retrievals. As with the random error analysis, the level of uncertainty introduced by these biases is low  
663 enough to allow for a meaningful OH product. Despite these differences, the methodology to determine  
664 TCOH using machine learning that we have presented here still captures the variability in TCOH,  
665 consistent with the ATom evaluation outlined in Section 5.1. To reduce the uncertainty of TCOH, better  
666 evaluation of NO<sub>2</sub> in the remote atmosphere is needed to determine which retrievals, if any, are  
667 accurate.

668

## 669 **6 Discussion and recommendations for future observations**

670 The method of estimating clear-sky TCOH presented here has the potential to increase our  
671 understanding of the atmospheric oxidation capacity. Because of the long record of observations from  
672 MOPITT, OMI, AIRS, and MODIS, we can calculate tropical TCOH from 2005 to the present, and since the  
673 methodology is not constrained to a particular satellite, newer satellite missions could extend the  
674 dataset beyond the end of these instruments' lifetimes. In addition, this methodology will provide sub-  
675 hemispheric information on OH variability, supplementing information available from MCF inversions.

676

677 The methodology could be expanded to the extra-tropics and over land, allowing for global constraints  
678 on OH. This will likely require additional satellite retrievals, like that of isoprene (Wells et al., 2020), in  
679 regions with more complex VOC chemistry than in the remote atmosphere. Expanding this product  
680 beyond the tropics could increase understanding of global CH<sub>4</sub>, CO, and VOC trends and variability and  
681 allow for a wider range of satellite retrievals as inputs. For example, geostationary air quality satellites  
682 such as TEMPO (Tropospheric Emissions: Monitoring of Pollution), scheduled to be launched in 2023,  
683 will provide retrievals of most of the necessary inputs to the machine learning model, allowing for the  
684 understanding of diurnal variability in TCOH and potentially in the diurnal variability of ozone production  
685 (Zhu et al., 2022b).

686

687 A similar methodology could likely be used to determine OH at different layers of the atmosphere.  
688 Because CH<sub>4</sub> loss is not evenly distributed throughout the tropospheric column, vertically resolved OH  
689 would better help inform this process. While column inputs, such as those discussed here, could be  
690 used, the inclusion of vertically resolved satellite retrievals, such as the AIRS H<sub>2</sub>O<sub>(v)</sub> layers, would provide  
691 additional information. Tropospheric O<sub>3</sub> at different atmospheric layers, such as that previously  
692 provided by the TES satellite, could also be invaluable here, as O<sub>3</sub> is a large driver of primary OH  
693 production.

694

695 Satellite-derived OH would also provide a much-needed, observational constraint on OH variability in  
696 global chemistry models. Because the methodology can capture variability in TCOH of both  
697 observations and 3-dimensional model output, TCOH trends from a satellite-constrained product could  
698 be used to evaluate modeled trends and as well as the spatial variability resulting from events like ENSO.  
699 While the satellite-derived OH could not explicitly indicate the cause of differences, the spatial  
700 distribution of the differences as well as differences in observed and modeled machine learning model  
701 inputs could indicate potential dynamical or emission sources of error in the 3D model.

702

703 Further, the combination of the satellite-derived OH and the machine learning model could help identify  
704 the impacts of any diagnosed errors in emissions inventories as well as the impacts of unexpected  
705 events, such as COVID-19-related shutdowns, on TCOH. For example, if there are significant  
706 discrepancies between observed and modeled NO<sub>2</sub> in a specific region of the atmosphere, the satellite  
707 NO<sub>2</sub> could be scaled to more closely match the 3D model values and then be input into the machine



708 learning model. The difference in TCOH would then indicate the relative impact of the model error,  
709 serving as a computationally efficient way to identify the impacts of these errors on the atmospheric  
710 oxidation capacity. A similar methodology could be used for unexpected events that significantly impact  
711 emissions of OH drivers, allowing for quick determination of their potential impacts on the atmospheric  
712 oxidation capacity before emissions inventories could be revised.

713

714 While we have shown that the methodology captures the variability of OH, it is unclear whether a bias in  
715 magnitude when compared to observations of OH results from GBRT model deficiencies or structural  
716 differences between the *in situ* observations and the training dataset. Additional field campaigns with  
717 observations of OH and the GBRT model inputs would allow for a more thorough evaluation of both the  
718 OH product and the methodology itself. Such a field campaign would need to provide complete  
719 tropospheric columns of all species and cover less horizontal distance than the ATom profiles (e.g. from  
720 spiral flight patterns). In situ observations of NO<sub>2</sub> without significant interference from NO<sub>x</sub> reservoir  
721 species are also needed to reduce uncertainty. Alternatively, NO<sub>2</sub> and other species could be measured  
722 through aircraft-based remote sensing. Finally, repeated sampling over the same locations for multiple  
723 days within a defined area would allow for meaningful statistical analysis while also allowing for the  
724 comparison of TCOH columns calculated from satellite observations.

725

726 Finally, accuracy of the TCOH product is dependent on the accuracy of the satellite retrievals input into  
727 the machine learning model, with the NO<sub>2</sub> retrieval having the largest effect. To reduce the uncertainty  
728 of the TCOH product, more information about the accuracy of individual NO<sub>2</sub> retrievals is required.  
729 Currently, there is little validation of OMI and TROPOMI NO<sub>2</sub> retrievals in the remote, tropical  
730 atmosphere, so it is difficult to assess, which retrievals, if any, are correct. Even retrievals of TROPOMI  
731 and OMI made with the same algorithm show differences, suggesting that instrumental differences  
732 could also affect the results. **Future satellite missions should focus on trying to reduce the uncertainty  
733 in NO<sub>2</sub> retrievals,** both through improvements in instrument design and algorithm development.

734

### 735 **7 Data Availability**

736 Output from the MERRA2 GMI simulation are publicly available at [https://acd-  
737 ext.gsfc.nasa.gov/Projects/GEOSSCCM/MERRA2GMI/](https://acd-ext.gsfc.nasa.gov/Projects/GEOSSCCM/MERRA2GMI/) (NASA Goddard Space Flight Center, 2022). All  
738 satellite products, except for TROPOMI water vapor, are available at <https://disc.gsfc.nasa.gov> (GES  
739 DISC, 2022). Data from the ATom campaign are located at <https://daac.ornl.gov> (Wofsy et al., 2021).

740

### 741 **8 Author contributions**

742 DCA wrote the manuscript, performed the data analysis, and created the GBRT model. DCA, BND, JMN,  
743 and MBFC developed the idea for the methodology. SAS performed three-dimensional modeling for the  
744 work. JMN provided advice on machine learning. JL helped perform data analysis. All authors helped  
745 develop ideas for the analysis and contributed to the manuscript.

746

### 747 **9 Competing Interests**

748 BND is a member of the editorial board of Atmospheric Chemistry and Physics. The peer-review process  
749 was guided by an independent editor, and the authors also have no other competing interests to  
750 declare.

751

### 752 **10 Financial support**

753 This research has been supported by the National Aeronautics and Space Administration (NASA)  
754 Atmospheric Composition Campaign Data Analysis and Modeling (ACCDAM) program (grant no.  
755 80NSSC21K1440).



756

757 **11 Acknowledgements**

758 The authors wish to thank Lok Chan and Diego Loyola for use of the TROPOMI water vapor product.

759

760 **12 References**

761

762 Anderson, D. C., Nicely, J. M., Salawitch, R. J., Canty, T. P., Dickerson, R. R., Hanisco, T. F., Wolfe, G. M.,  
763 Apel, E. C., Atlas, E., Bannan, T., Bauguitte, S., Blake, N. J., Bresch, J. F., Campos, T. L., Carpenter, L. J.,  
764 Cohen, M. D., Evans, M., Fernandez, R. P., Kahn, B. H., Kinnison, D. E., Hall, S. R., Harris, N. R., Hornbrook,  
765 R. S., Lamarque, J. F., Le Breton, M., Lee, J. D., Percival, C., Pfister, L., Pierce, R. B., Riemer, D. D., Saiz-  
766 Lopez, A., Stunder, B. J., Thompson, A. M., Ullmann, K., Vaughan, A., and Weinheimer, A. J.: A pervasive  
767 role for biomass burning in tropical high ozone/low water structures, *Nat Commun*, 7, 10267,  
768 [https://10.1038/ncomms10267](https://doi.org/10.1038/ncomms10267), 2016.

769 Anderson, D. C., Duncan, B. N., Fiore, A. M., Baublitz, C. B., Follette-Cook, M. B., Nicely, J. M., and Wolfe,  
770 G. M.: Spatial and temporal variability in the hydroxyl (OH) radical: understanding the role of large-scale  
771 climate features and their influence on OH through its dynamical and photochemical drivers,  
772 *Atmospheric Chemistry and Physics*, 21, 6481-6508, [https://10.5194/acp-21-6481-2021](https://doi.org/10.5194/acp-21-6481-2021), 2021.

773 Anderson, D. C., Follette-Cook, M. B., Strode, S. A., Nicely, J. M., Liu, J., Ivatt, P. D., and Duncan, B. N.: A  
774 machine learning methodology for the generation of a parameterization of the hydroxyl radical, *Geosci.*  
775 *Model Dev.*, 15, 6341-6358, [https://10.5194/gmd-15-6341-2022](https://doi.org/10.5194/gmd-15-6341-2022), 2022.

776 Bedka, S., Knuteson, R., Revercomb, H., Tobin, D., and Turner, D.: An assessment of the absolute  
777 accuracy of the Atmospheric Infrared Sounder v5 precipitable water vapor product at tropical,  
778 midlatitude, and arctic ground-truth sites: September 2002 through August 2008, *Journal of Geophysical*  
779 *Research: Atmospheres*, 115, D17310, <https://doi.org/10.1029/2009JD013139>, 2010.

780 Borsdorff, T., aan de Brugh, J., Schneider, A., Lorente, A., Birk, M., Wagner, G., Kivi, R., Hase, F., Feist, D.  
781 G., Sussmann, R., Rettinger, M., Wunch, D., Warneke, T., and Landgraf, J.: Improving the TROPOMI CO  
782 data product: update of the spectroscopic database and destripping of single orbits, *Atmos. Meas. Tech.*,  
783 12, 5443-5455, [https://10.5194/amt-12-5443-2019](https://doi.org/10.5194/amt-12-5443-2019), 2019.

784 Brune, W. H., Miller, D. O., Thames, A. B., Allen, H. M., Apel, E. C., Blake, D. R., Bui, T. P., Commane, R.,  
785 Crouse, J. D., Daube, B. C., Diskin, G. S., DiGangi, J. P., Elkins, J. W., Hall, S. R., Hanisco, T. F., Hannun, R.  
786 A., Hints, E. J., Hornbrook, R. S., Kim, M. J., McKain, K., Moore, F. L., Neuman, J. A., Nicely, J. M., Peischl,  
787 J., Ryerson, T. B., St. Clair, J. M., Sweeney, C., Teng, A. P., Thompson, C., Ullmann, K., Veres, P. R.,  
788 Wennberg, P. O., and Wolfe, G. M.: Exploring Oxidation in the Remote Free Troposphere: Insights From  
789 Atmospheric Tomography (ATom), *Journal of Geophysical Research: Atmospheres*, 125, e2019JD031685,  
790 [https://10.1029/2019jd031685](https://doi.org/10.1029/2019jd031685), 2020.

791 Buchholz, R. R., Deeter, M. N., Worden, H. M., Gille, J., Edwards, D. P., Hannigan, J. W., Jones, N. B.,  
792 Paton-Walsh, C., Griffith, D. W. T., Smale, D., Robinson, J., Strong, K., Conway, S., Sussmann, R., Hase, F.,  
793 Blumenstock, T., Mahieu, E., and Langerock, B.: Validation of MOPITT carbon monoxide using ground-  
794 based Fourier transform infrared spectrometer data from NDACC, *Atmos. Meas. Tech.*, 10, 1927-1956,  
795 [https://10.5194/amt-10-1927-2017](https://doi.org/10.5194/amt-10-1927-2017), 2017.





- 796 Burnett, C. R., and Minschwaner, K.: Continuing development in the regime of decreased atmospheric  
797 column OH at Fritz Peak, Colorado, *Geophysical Research Letters*, 25, 1313-1316,  
798 <https://doi.org/10.1029/98GL01062>, 1998.
- 799 Chan, K. L., Xu, J., Slijkhuis, S., Valks, P., and Loyola, D.: TROPOspheric Monitoring Instrument  
800 observations of total column water vapour: Algorithm and validation, *Science of The Total Environment*,  
801 821, 153232, <https://doi.org/10.1016/j.scitotenv.2022.153232>, 2022.
- 802 Chen, T., and Guestrin, C.: XGBoost: A Scalable Tree Boosting System, *KDD '16: Proceedings of the 22nd*  
803 *ACM SIGKDD International Conference on Knowledge Discovery and Data Mining*, 13 - 17 Aug. 2016,  
804 785-794, San Francisco, CA, USA, <https://doi.org/10.1145/2939672.2939785>, 2016.
- 805 Chin, T. M., Vazquez-Cuervo, J., and Armstrong, E. M.: A multi-scale high-resolution analysis of global sea  
806 surface temperature, *Remote Sensing of Environment*, 200, 154-169,  
807 <https://doi.org/10.1016/j.rse.2017.07.029>, 2017.
- 808 Choi, S., Lamsal, L. N., Follette-Cook, M., Joiner, J., Krotkov, N. A., Swartz, W. H., Pickering, K. E.,  
809 Loughner, C. P., Appel, W., Pfister, G., Saide, P. E., Cohen, R. C., Weinheimer, A. J., and Herman, J. R.:  
810 Assessment of NO<sub>2</sub> observations during DISCOVER-AQ and KORUS-AQ field campaigns, *Atmos. Meas.*  
811 *Tech.*, 13, 2523-2546, <https://10.5194/amt-13-2523-2020>, 2020.
- 812 De Smedt, I., Theys, N., Yu, H., Danckaert, T., Lerot, C., Compernelle, S., Van Roozendael, M., Richter, A.,  
813 Hilboll, A., Peters, E., Pedernana, M., Loyola, D., Beirle, S., Wagner, T., Eskes, H., van Geffen, J.,  
814 Boersma, K. F., and Veefkind, P.: Algorithm theoretical baseline for formaldehyde retrievals from S5P  
815 TROPOMI and from the QA4ECV project, *Atmospheric Measurement Techniques*, 11, 2395-2426,  
816 <https://10.5194/amt-11-2395-2018>, 2018.
- 817 De Smedt, I., Pinardi, G., Vigouroux, C., Compernelle, S., Bais, A., Benavent, N., Boersma, F., Chan, K. L.,  
818 Donner, S., Eichmann, K. U., Hedelt, P., Hendrick, F., Irie, H., Kumar, V., Lambert, J. C., Langerock, B.,  
819 Lerot, C., Liu, C., Loyola, D., Piders, A., Richter, A., Rivera Cárdenas, C., Romahn, F., Ryan, R. G., Sinha, V.,  
820 Theys, N., Vlietinck, J., Wagner, T., Wang, T., Yu, H., and Van Roozendael, M.: Comparative assessment  
821 of TROPOMI and OMI formaldehyde observations and validation against MAX-DOAS network column  
822 measurements, *Atmos. Chem. Phys.*, 21, 12561-12593, <https://10.5194/acp-21-12561-2021>, 2021.
- 823 Deeter, M. N., Edwards, D. P., Francis, G. L., Gille, J. C., Mao, D., Martínez-Alonso, S., Worden, H. M.,  
824 Ziskin, D., and Andreae, M. O.: Radiance-based retrieval bias mitigation for the MOPITT instrument: the  
825 version 8 product, *Atmospheric Measurement Techniques*, 12, 4561-4580, [https://10.5194/amt-12-](https://10.5194/amt-12-4561-2019)  
826 4561-2019, 2019.
- 827 Duncan, B., Portman, D., Bey, I., and Spivakovsky, C.: Parameterization of OH for efficient computation in  
828 chemical tracer models, *Journal of Geophysical Research: Atmospheres*, 105, 12259-12262,  
829 <https://10.1029/1999JD901141>, 2000.
- 830 Duncan, B. N., Strahan, S. E., Yoshida, Y., Steenrod, S. D., and Livesey, N.: Model study of the cross-  
831 tropopause transport of biomass burning pollution, *Atmos. Chem. Phys.*, 7, 3713-3736, [10.5194/acp-7-](https://10.5194/acp-7-3713-2007)  
832 3713-2007, 2007.
- 833 Elith, J., Leathwick, J. R., and Hastie, T.: A working guide to boosted regression trees, *J Anim Ecol*, 77,  
834 802-813, <https://10.1111/j.1365-2656.2008.01390.x>, 2008.





- 835 Garane, K., Koukouli, M. E., Verhoelst, T., Lerot, C., Heue, K. P., Fioletov, V., Balis, D., Bais, A., Bazureau,  
836 A., Dehn, A., Goutail, F., Granville, J., Griffin, D., Hubert, D., Keppens, A., Lambert, J. C., Loyola, D.,  
837 McLinden, C., Pazmino, A., Pommereau, J. P., Redondas, A., Romahn, F., Valks, P., Van Roozendael, M.,  
838 Xu, J., Zehner, C., Zerefos, C., and Zimmer, W.: TROPOMI/S5P total ozone column data: global ground-  
839 based validation and consistency with other satellite missions, *Atmos. Meas. Tech.*, 12, 5263-5287,  
840 <https://10.5194/amt-12-5263-2019>, 2019.
- 841 Gelaro, R., McCarty, W., Suarez, M. J., Todling, R., Molod, A., Takacs, L., Randles, C., Darmenov, A.,  
842 Bosilovich, M. G., Reichle, R., Wargan, K., Coy, L., Cullather, R., Draper, C., Akella, S., Buchard, V., Conaty,  
843 A., da Silva, A., Gu, W., Kim, G. K., Koster, R., Lucchesi, R., Merkova, D., Nielsen, J. E., Partyka, G.,  
844 Pawson, S., Putman, W., Rienecker, M., Schubert, S. D., Sienkiewicz, M., and Zhao, B.: The Modern-Era  
845 Retrospective Analysis for Research and Applications, Version 2 (MERRA-2), *J Clim*, Volume 30, 5419-  
846 5454, <https://10.1175/JCLI-D-16-0758.1>, 2017.
- 847 GES DISC: Earth Science Data at NASA, available at <https://disc.gsfc.nasa.gov>, last access: 1 Nov. 2022.
- 848 González Abad, G., Liu, X., Chance, K., Wang, H., Kurosu, T. P., and Suleiman, R.: Updated Smithsonian  
849 Astrophysical Observatory Ozone Monitoring Instrument (SAO OMI) formaldehyde retrieval,  
850 *Atmospheric Measurement Techniques*, 8, 19-32, <https://10.5194/amt-8-19-2015>, 2015.
- 851 González Abad, G., Vasilkov, A., Seftor, C., Liu, X., and Chance, K.: Smithsonian Astrophysical Observatory  
852 Ozone Mapping and Profiler Suite (SAO OMPS) formaldehyde retrieval, *Atmospheric Measurement*  
853 *Techniques*, 9, 2797-2812, <https://10.5194/amt-9-2797-2016>, 2016.
- 854 Hedelius, J. K., He, T. L., Jones, D. B. A., Baier, B. C., Buchholz, R. R., De Mazière, M., Deutscher, N. M.,  
855 Dubey, M. K., Feist, D. G., Griffith, D. W. T., Hase, F., Iraci, L. T., Jeseck, P., Kiel, M., Kivi, R., Liu, C.,  
856 Morino, I., Notholt, J., Oh, Y. S., Ohyama, H., Pollard, D. F., Rettinger, M., Roche, S., Roehl, C. M.,  
857 Schneider, M., Shiomi, K., Strong, K., Sussmann, R., Sweeney, C., Té, Y., Uchino, O., Velazco, V. A., Wang,  
858 W., Warneke, T., Wennberg, P. O., Worden, H. M., and Wunch, D.: Evaluation of MOPITT Version 7 joint  
859 TIR–NIR XCO retrievals with TCCON, *Atmos. Meas. Tech.*, 12, 5547-5572, [https://10.5194/amt-12-5547-](https://10.5194/amt-12-5547-2019)  
860 2019, 2019.
- 861 Ivatt, P. D., and Evans, M. J.: Improving the prediction of an atmospheric chemistry transport model  
862 using gradient-boosted regression trees, *Atmospheric Chemistry and Physics*, 20, 8063-8082,  
863 <https://10.5194/acp-20-8063-2020>, 2020.
- 864 Keller, C. A., and Evans, M. J.: Application of random forest regression to the calculation of gas-phase  
865 chemistry within the GEOS-Chem chemistry model v10, *Geoscientific Model Development*, 12, 1209-  
866 1225, <https://10.5194/gmd-12-1209-2019>, 2019.
- 867 Kelp, M. M., Jacob, D. J., Kutz, J. N., Marshall, J. D., and Tessum, C. W.: Toward Stable, General Machine-  
868 Learned Models of the Atmospheric Chemical System, *Journal of Geophysical Research: Atmospheres*,  
869 125, e2020JD032759, <https://doi.org/10.1029/2020JD032759>, 2020.
- 870 Labow, G. J., McPeters, R. D., Bhartia, P. K., and Kramarova, N.: A comparison of 40 years of SBUV  
871 measurements of column ozone with data from the Dobson/Brewer network, *Journal of Geophysical*  
872 *Research: Atmospheres*, 118, 7370-7378, <https://doi.org/10.1002/jgrd.50503>, 2013.



- 873 Lamsal, L. N., Krotkov, N. A., Celarier, E. A., Swartz, W. H., Pickering, K. E., Bucsela, E. J., Gleason, J. F.,  
874 Martin, R. V., Philip, S., Irie, H., Cede, A., Herman, J., Weinheimer, A., Szykman, J. J., and Knepp, T. N.:  
875 Evaluation of OMI operational standard NO<sub>2</sub> column retrievals using in situ and surface-based NO<sub>2</sub>  
876 observations, *Atmospheric Chemistry and Physics*, 14, 11587-11609, [https://10.5194/acp-14-11587-](https://10.5194/acp-14-11587-877)  
877 2014, 2014.
- 878 Lamsal, L. N., Krotkov, N. A., Vasilkov, A., Marchenko, S., Qin, W., Yang, E. S., Fasnacht, Z., Joiner, J., Choi,  
879 S., Haffner, D., Swartz, W. H., Fisher, B., and Bucsela, E.: Ozone Monitoring Instrument (OMI) Aura  
880 nitrogen dioxide standard product version 4.0 with improved surface and cloud treatments, *Atmos.*  
881 *Meas. Tech.*, 14, 455-479, <https://10.5194/amt-14-455-2021>, 2021.
- 882 Lamsal, L. N., Krotkov, N. A., Marchenko, S. V., Joiner, J., Oman, L., Vasilkov, A., Fisher, B., Qin, W., Yang,  
883 E.-S., Fasnacht, Z., Choi, S., Leonard, P., and Haffner, D.: TROPOMI/S5P NO<sub>2</sub> Tropospheric, Stratospheric  
884 and Total Columns MINDS 1-Orbit L2 Swath 5.5 km x 3.5 km, in, NASA Goddard Earth Sciences Data and  
885 Information Services Center (GES DISC) [data set], <https://10.5067/MEASURES/MINDS/Data203>, 2022.
- 886 Laughner, J. L., Neu, J. L., Schimel, D., Wennberg, P. O., Barsanti, K., Bowman, K. W., Chatterjee, A.,  
887 Croes, B. E., Fitzmaurice, H. L., Henze, D. K., Kim, J., Kort, E. A., Liu, Z., Miyazaki, K., Turner, A. J.,  
888 Anenberg, S., Avise, J., Cao, H., Crisp, D., de Gouw, J., Eldering, A., Fyfe, J. C., Goldberg, D. L., Gurney, K.  
889 R., Hasheminassab, S., Hopkins, F., Ivey, C. E., Jones, D. B. A., Liu, J., Lovenduski, N. S., Martin, R. V.,  
890 McKinley, G. A., Ott, L., Poulter, B., Ru, M., Sander, S. P., Swart, N., Yung, Y. L., and Zeng, Z. C.: Societal  
891 shifts due to COVID-19 reveal large-scale complexities and feedbacks between atmospheric chemistry  
892 and climate change, *Proc Natl Acad Sci U S A*, 118, e2109481118, <https://10.1073/pnas.2109481118>,  
893 2021.
- 894 Levy, R. C., Mattoo, S., Munchak, L. A., Remer, L. A., Sayer, A. M., Patadia, F., and Hsu, N. C.: The  
895 Collection 6 MODIS aerosol products over land and ocean, *Atmos. Meas. Tech.*, 6, 2989-3034,  
896 <https://10.5194/amt-6-2989-2013>, 2013.
- 897 Liang, Q., Chipperfield, M. P., Fleming, E. L., Abraham, N. L., Braesicke, P., Burkholder, J. B., Daniel, J. S.,  
898 Dhomse, S., Fraser, P. J., Hardiman, S. C., Jackman, C. H., Kinnison, D. E., Krummel, P. B., Montzka, S. A.,  
899 Morgenstern, O., McCulloch, A., Mühle, J., Newman, P. A., Orkin, V. L., Pitari, G., Prinn, R. G., Rigby, M.,  
900 Rozanov, E., Stenke, A., Tummon, F., Velders, G. J. M., Visioni, D., and Weiss, R. F.: Deriving Global OH  
901 Abundance and Atmospheric Lifetimes for Long-Lived Gases: A Search for CH<sub>3</sub>CCl<sub>3</sub> Alternatives, *Journal*  
902 *of Geophysical Research: Atmospheres*, 122, 11,914-11,933, <https://10.1002/2017JD026926>, 2017.
- 903 Lovelock, J. E.: Methyl chloroform in the troposphere as an indicator of OH radical abundance, *Nature*,  
904 267, 32-32, <https://10.1038/267032a0>, 1977.
- 905 Mao, J., Ren, X., Brune, W. H., Olson, J. R., Crawford, J. H., Fried, A., Huey, L. G., Cohen, R. C., Heikes, B.,  
906 Singh, H. B., Blake, D. R., Sachse, G. W., Diskin, G. S., Hall, S. R., and Shetter, R. E.: Airborne measurement  
907 of OH reactivity during INTEX-B, *Atmos. Chem. Phys.*, 9, 163-173, <https://10.5194/acp-9-163-2009>, 2009.
- 908 Martínez-Alonso, S., Deeter, M., Worden, H., Borsdorff, T., Aben, I., Commane, R., Daube, B., Francis, G.,  
909 George, M., Landgraf, J., Mao, D., McKain, K., and Wofsy, S.: 1.5 years of TROPOMI CO measurements:  
910 comparisons to MOPITT and ATom, *Atmos. Meas. Tech.*, 13, 4841-4864, [https://10.5194/amt-13-4841-](https://10.5194/amt-13-4841-911)  
911 2020, 2020.



- 912 McPeters, R. D., Frith, S., and Labow, G. J.: OMI total column ozone: extending the long-term data  
913 record, *Atmos. Meas. Tech.*, 8, 4845-4850, [https://10.5194/amt-8-4845-2015](https://doi.org/10.5194/amt-8-4845-2015), 2015.
- 914 Miller, D. O., and Brune, W. H.: Investigating the Understanding of Oxidation Chemistry Using 20 Years  
915 of Airborne OH and HO<sub>2</sub> Observations, *Journal of Geophysical Research: Atmospheres*, 127,  
916 e2021JD035368, <https://doi.org/10.1029/2021JD035368>, 2022.
- 917 Montzka, S. A., Krol, M., Dlugokencky, E., Hall, B., Jockel, P., and Lelieveld, J.: Small Interannual  
918 Variability of Global Atmospheric Hydroxyl, *Science*, 331, 67-69, [https://10.1126/science.1197640](https://doi.org/10.1126/science.1197640), 2011.
- 919 Murray, L. T., Mickley, L. J., Kaplan, J. O., Sofen, E. D., Pfeiffer, M., and Alexander, B.: Factors controlling  
920 variability in the oxidative capacity of the troposphere since the Last Glacial Maximum, *Atmospheric  
921 Chemistry and Physics*, 14, 3589-3622, [https://10.5194/acp-14-3589-2014](https://doi.org/10.5194/acp-14-3589-2014), 2014.
- 922 Murray, L. T., Fiore, A. M., Shindell, D. T., Naik, V., and Horowitz, L. W.: Large uncertainties in global  
923 hydroxyl projections tied to fate of reactive nitrogen and carbon, *Proceedings of the National Academy  
924 of Sciences*, 118, e2115204118, [https://10.1073/pnas.2115204118](https://doi.org/10.1073/pnas.2115204118), 2021.
- 925 NASA Goddard Space Flight Center. MERRA2 GMI, NASA [data set], [https://acd-  
926 ext.gsfc.nasa.gov/Projects/GEOSSCCM/MERRA2GMI/](https://acd-ext.gsfc.nasa.gov/Projects/GEOSSCCM/MERRA2GMI/), last access: 1 November 2022.
- 927 Naus, S., Montzka, S. A., Pandey, S., Basu, S., Dlugokencky, E. J., and Krol, M.: Constraints and biases in a  
928 tropospheric two-box model of OH, *Atmos. Chem. Phys.*, 19, 407-424, [https://10.5194/acp-19-407-2019](https://doi.org/10.5194/acp-19-407-2019),  
929 2019.
- 930 Nicely, J. M., Anderson, D. C., Canty, T. P., Salawitch, R. J., Wolfe, G. M., Apel, E. C., Arnold, S. R., Atlas, E.  
931 L., Blake, N. J., Bresch, J. F., Campos, T. L., Fernandez, R. P., Flemming, J., Hall, S. R., Hanisco, T. F.,  
932 Honomichl, S. B., Hornbrook, R. S., Huijnen, V., Kaser, L., Kinnison, D. E., Pan, L. L., Riemer, D. D., Saiz-  
933 Lopez, A., Steenrod, S. D., Stell, M. H., Tilmes, S., Turquety, S., Ullmann, K., and Weinheimer, A. J.: An  
934 observationally constrained evaluation of the oxidative capacity in the tropical western Pacific  
935 troposphere, *Journal of Geophysical Research: Atmospheres*, 121, 7461-7488,  
936 [https://10.1002/2016JD025067](https://doi.org/10.1002/2016JD025067), 2016.
- 937 Nicely, J. M., Salawitch, R. J., Canty, T., Anderson, D. C., Arnold, S. R., Chipperfield, M. P., Emmons, L. K.,  
938 Flemming, J., Huijnen, V., Kinnison, D. E., Lamarque, J.-F., Mao, J., Monks, S. A., Steenrod, S. D., Tilmes,  
939 S., and Turquety, S.: Quantifying the causes of differences in tropospheric OH within global models,  
940 *Journal of Geophysical Research: Atmospheres*, JD026239, [https://10.1002/2016JD026239](https://doi.org/10.1002/2016JD026239), 2017.
- 941 Nicely, J. M., Duncan, B. N., Hanisco, T. F., Wolfe, G. M., Salawitch, R. J., Deushi, M., Haslerud, A. S.,  
942 Jöckel, P., Josse, B., Kinnison, D. E., Klekociuk, A., Manyin, M. E., Marécal, V., Morgenstern, O., Murray, L.  
943 T., Myhre, G., Oman, L. D., Pitari, G., Pozzer, A., Quaglia, I., Revell, L. E., Rozanov, E., Stenke, A., Stone, K.,  
944 Strahan, S., Tilmes, S., Tost, H., Westervelt, D. M., and Zeng, G.: A machine learning examination of  
945 hydroxyl radical differences among model simulations for CCMI-1, *Atmospheric Chemistry and Physics*,  
946 20, 1341-1361, [https://10.5194/acp-20-1341-2020](https://doi.org/10.5194/acp-20-1341-2020), 2020.
- 947 Oman, L. D., Douglass, A. R., Ziemke, J. R., Rodriguez, J. M., Waugh, D. W., and Nielsen, J. E.: The ozone  
948 response to ENSO in Aura satellite measurements and a chemistry-climate simulation, *Journal of  
949 Geophysical Research-Atmospheres*, 118, 965-976, [https://10.1029/2012jd018546](https://doi.org/10.1029/2012jd018546), 2013.



- 950 Orbe, C., Oman, L. D., Strahan, S. E., Waugh, D. W., Pawson, S., Takacs, L. L., and Molod, A. M.: Large-  
951 Scale Atmospheric Transport in GEOS Replay Simulations, *Journal of Advances in Modeling Earth*  
952 *Systems*, 9, 2545-2560, [10.1002/2017ms001053](https://doi.org/10.1002/2017ms001053), 2017.
- 953 Pérez-Ramírez, D., Smirnov, A., Pinker, R. T., Petrenko, M., Román, R., Chen, W., Ichoku, C., Noël, S.,  
954 Abad, G. G., Lyamani, H., and Holben, B. N.: Precipitable water vapor over oceans from the Maritime  
955 Aerosol Network: Evaluation of global models and satellite products under clear sky conditions,  
956 *Atmospheric Research*, 215, 294-304, <https://doi.org/10.1016/j.atmosres.2018.09.007>, 2019.
- 957 Pickett, H. M., Drouin, B. J., Canty, T., Salawitch, R. J., Fuller, R. A., Perun, V. S., Livesey, N. J., Waters, J.  
958 W., Stachnik, R. A., Sander, S. P., Traub, W. A., Jucks, K. W., and Minschwaner, K.: Validation of Aura  
959 Microwave Limb Sounder OH and HO<sub>2</sub> measurements, *Journal of Geophysical Research: Atmospheres*,  
960 113, D16S30, <https://doi.org/10.1029/2007JD008775>, 2008.
- 961 Pimlott, M. A., Pope, R. J., Kerridge, B. J., Latter, B. G., Knappett, D. S., Heard, D. E., Ventress, L. J.,  
962 Siddans, R., Feng, W., and Chipperfield, M. P.: Investigating the global OH radical distribution using  
963 steady-state approximations and satellite data, *Atmos. Chem. Phys.*, 22, 10467-10488,  
964 <https://10.5194/acp-22-10467-2022>, 2022.
- 965 Rigby, M., Montzka, S. A., Prinn, R. G., White, J. W. C., Young, D., O'Doherty, S., Lunt, M. F., Ganesan, A.  
966 L., Manning, A. J., Simmonds, P. G., Salameh, P. K., Harth, C. M., Muhle, J., Weiss, R. F., Fraser, P. J.,  
967 Steele, L. P., Krummel, P. B., McCulloch, A., and Park, S.: Role of atmospheric oxidation in recent  
968 methane growth, *Proc Natl Acad Sci USA*, 114, 5373-5377, <https://10.1073/pnas.1616426114>, 2017.
- 969 Shah, V., Jacob, D. J., Dang, R., Lamsal, L. N., Strode, S. A., Steenrod, S. D., et al. (2022). Nitrogen oxides  
970 in the free troposphere: Implications for tropospheric oxidants and the interpretation of satellite NO<sub>2</sub>  
971 measurements. *EGUsphere*, 2022, 1-47. [https://egusphere.copernicus.org/preprints/egusphere-2022-  
972 656/](https://egusphere.copernicus.org/preprints/egusphere-2022-656/).
- 973 Silvern, R. F., Jacob, D. J., Travis, K. R., Sherwen, T., Evans, M. J., Cohen, R. C., Laughner, J. L., Hall, S. R.,  
974 Ullmann, K., Crouse, J. D., Wennberg, P. O., Peischl, J., and Pollack, I. B.: Observed NO/NO<sub>2</sub> Ratios in the  
975 Upper Troposphere Imply Errors in NO-NO<sub>2</sub>-O<sub>3</sub> Cycling Kinetics or an Unaccounted NO<sub>x</sub> Reservoir,  
976 *Geophysical Research Letters*, 45, 4466-4474, <https://doi.org/10.1029/2018GL077728>, 2018.
- 977 Stauffer, R. M., Thompson, A. M., and Young, G. S.: Tropospheric ozonesonde profiles at long-term U.S.  
978 monitoring sites: 1. A climatology based on self-organizing maps, *Journal of Geophysical Research:*  
979 *Atmospheres*, 121, 1320-1339, <https://doi.org/10.1002/2015JD023641>, 2016.
- 980 Strahan, S. E., Duncan, B. N., and Hoor, P.: Observationally derived transport diagnostics for the  
981 lowermost stratosphere and their application to the GMI chemistry and transport model, *Atmos. Chem.*  
982 *Phys.*, 7, 2435-2445, <https://10.5194/acp-7-2435-2007>, 2007.
- 983 Strode, S. A., Ziemke, J. R., Oman, L. D., Lamsal, L. N., Olsen, M. A., and Liu, J.: Global changes in the  
984 diurnal cycle of surface ozone, *Atmospheric Environment*, 199, 323-333,  
985 <https://10.1016/j.atmosenv.2018.11.028>, 2019.
- 986 Susskind, J., Blaisdell, J. M., and Iredell, L.: Improved methodology for surface and atmospheric  
987 soundings, error estimates, and quality control procedures: the atmospheric infrared sounder science



- 988 team version-6 retrieval algorithm, *Journal of Applied Remote Sensing*, 8, 084994,  
989 <https://10.1117/1.Jrs.8.084994>, 2014.
- 990 Thompson, C. R., Wofsy, S. C., Prather, M. J., Newman, P. A., Hanisco, T. F., Ryerson, T. B., Fahey, D. W.,  
991 Apel, E. C., Brock, C. A., Brune, W. H., Froyd, K., Katich, J. M., Nicely, J. M., Peischl, J., Ray, E., Veres, P. R.,  
992 Wang, S., Allen, H. M., Asher, E., Bian, H., Blake, D., Bourgeois, I., Budney, J., Bui, T. P., Butler, A.,  
993 Campuzano-Jost, P., Chang, C., Chin, M., Commane, R., Correa, G., Crouse, J. D., Daube, B., Dibb, J. E.,  
994 DiGangi, J. P., Diskin, G. S., Dollner, M., Elkins, J. W., Fiore, A. M., Flynn, C. M., Guo, H., Hall, S. R.,  
995 Hannun, R. A., Hills, A., Hints, E. J., Hodzic, A., Hornbrook, R. S., Huey, L. G., Jimenez, J. L., Keeling, R. F.,  
996 Kim, M. J., Kupc, A., Lacey, F., Lait, L. R., Lamarque, J.-F., Liu, J., McKain, K., Meinardi, S., Miller, D. O.,  
997 Montzka, S. A., Moore, F. L., Morgan, E. J., Murphy, D. M., Murray, L. T., Nault, B. A., Neuman, J. A.,  
998 Nguyen, L., Gonzalez, Y., Rollins, A., Rosenlof, K., Sargent, M., Schill, G., Schwarz, J. P., Clair, J. M. S.,  
999 Steenrod, S. D., Stephens, B. B., Strahan, S. E., Strode, S. A., Sweeney, C., Thames, A. B., Ullmann, K.,  
1000 Wagner, N., Weber, R., Weinzierl, B., Wennberg, P. O., Williamson, C. J., Wolfe, G. M., and Zeng, L.: The  
1001 NASA Atmospheric Tomography (ATom) Mission: Imaging the Chemistry of the Global Atmosphere,  
1002 *Bulletin of the American Meteorological Society*, 103, E761-E790, <https://10.1175/BAMS-D-20-0315.1>,  
1003 2022.
- 1004 Turner, A. J., Frankenberg, C., Wennberg, P. O., and Jacob, D. J.: Ambiguity in the causes for decadal  
1005 trends in atmospheric methane and hydroxyl, *Proceedings of the National Academy of Sciences*, 114,  
1006 5367, <https://10.1073/pnas.1616020114>, 2017.
- 1007 Turner, A. J., Fung, I., Naik, V., Horowitz, L. W., and Cohen, R. C.: Modulation of hydroxyl variability by  
1008 ENSO in the absence of external forcing, *Proc Natl Acad Sci U S A*, 115, 8931-8936,  
1009 <https://10.1073/pnas.1807532115>, 2018.
- 1010 van Geffen, J., Boersma, K. F., Eskes, H., Sneep, M., ter Linden, M., Zara, M., and Veeffkind, J. P.: S5P  
1011 TROPOMI NO<sub>2</sub> slant column retrieval: method, stability, uncertainties and comparisons with OMI,  
1012 *Atmos. Meas. Tech.*, 13, 1315-1335, <https://10.5194/amt-13-1315-2020>, 2020.
- 1013 Veeffkind, J. P., Aben, I., McMullan, K., Förster, H., de Vries, J., Otter, G., Claas, J., Eskes, H. J., de Haan, J.  
1014 F., Kleipool, Q., van Weele, M., Hasekamp, O., Hoogeveen, R., Landgraf, J., Snel, R., Tol, P., Ingmann, P.,  
1015 Voors, R., Kruizinga, B., Vink, R., Visser, H., and Levelt, P. F.: TROPOMI on the ESA Sentinel-5 Precursor: A  
1016 GMES mission for global observations of the atmospheric composition for climate, air quality and ozone  
1017 layer applications, *Remote Sensing of Environment*, 120, 70-83,  
1018 <https://doi.org/10.1016/j.rse.2011.09.027>, 2012.
- 1019 Voulgarakis, A., Naik, V., Lamarque, J. F., Shindell, D. T., Young, P. J., Prather, M. J., Wild, O., Field, R. D.,  
1020 Bergmann, D., Cameron-Smith, P., Cionni, I., Collins, W. J., Dalsøren, S. B., Doherty, R. M., Eyring, V.,  
1021 Faluvegi, G., Folberth, G. A., Horowitz, L. W., Josse, B., MacKenzie, I. A., Nagashima, T., Plummer, D. A.,  
1022 Righi, M., Rumbold, S. T., Stevenson, D. S., Strode, S. A., Sudo, K., Szopa, S., and Zeng, G.: Analysis of  
1023 present day and future OH and methane lifetime in the ACCMIP simulations, *Atmospheric Chemistry and  
1024 Physics*, 13, 2563-2587, <https://10.5194/acp-13-2563-2013>, 2013.
- 1025 Wang, P., Piters, A., van Geffen, J., Tuinder, O., Stammes, P., and Kinne, S.: Shipborne MAX-DOAS  
1026 measurements for validation of TROPOMI NO<sub>2</sub> products, *Atmos. Meas. Tech.*, 13, 1413-1426,  
1027 <https://10.5194/amt-13-1413-2020>, 2020.



- 1028 Wells, K. C., Millet, D. B., Payne, V. H., Deventer, M. J., Bates, K. H., de Gouw, J. A., Graus, M., Warneke,  
1029 C., Wisthaler, A., and Fuentes, J. D.: Satellite isoprene retrievals constrain emissions and atmospheric  
1030 oxidation, *Nature*, 585, 225-233, <https://10.1038/s41586-020-2664-3>, 2020.
- 1031 Wofsy, S. C., Afshar, S., Allen, H. M., Apel, E. C., Asher, E. C., Barletta, B., Bent, J., Bian, H., Biggs, B. C.,  
1032 Blake, D. R., Blake, N., Bourgeois, I., Brock, C. A., Brune, W. H., Budney, J. W., Bui, T. P., Butler, A.,  
1033 Campuzano-Jost, P., Chang, C. S., Chin, M., Commane, R., Correa, G., Crouse, J. D., Cullis, P. D., Daube,  
1034 B. C., Day, D. A., Dean-Day, J. M., Dibb, J. E., DiGangi, J. P., Diskin, G. S., Dollner, M., Elkins, J. W., Erdesz,  
1035 F., Fiore, A. M., Flynn, C. M., Froyd, K. D., Gesler, D. W., Hall, S. R., Hanisco, T. F., Hannun, R. A., Hills, A.  
1036 J., Hints, E. J., Hoffman, A., Hornbrook, R. S., Huey, L. G., Hughes, S., Jimenez, J. L., Johnson, B. J., Katich,  
1037 J. M., Keeling, R. F., Kim, M. J., Kupc, A., Lait, L. R., McKain, K., McLaughlin, R. J., Meinardi, S., Miller, D.  
1038 O., Montzka, S. A., Moore, F. L., Morgan, E. J., Murphy, D. M., Murray, L. T., Nault, B. A., Neuman, J. A.,  
1039 Newman, P. A., Nicely, J. M., Pan, X., Paplawsky, W., Peischl, J., Prather, M. J., Price, D. J., Ray, E. A.,  
1040 Reeves, J. M., Richardson, M., Rollins, A. W., Rosenlof, K. H., Ryerson, T. B., Scheuer, E., Schill, G. P.,  
1041 Schroder, J. C., Schwarz, J. P., St.Clair, J. M., Steenrod, S. D., Stephens, B. B., Strode, S. A., Sweeney, C.,  
1042 Tanner, D., Teng, A. P., Thames, A. B., Thompson, C. R., Ullmann, K., Veres, P. R., Wagner, N. L., Watt, A.,  
1043 Weber, R., Weinzierl, B. B., Wennberg, P. O., Williamson, C. J., Wilson, J. C., Wolfe, G. M., Woods, C. T.,  
1044 Zeng, L. H., and Vieznor, N.: ATom: Merged Atmospheric Chemistry, Trace Gases, and Aerosols, Version  
1045 2, in, ORNL Distributed Active Archive Center, 2021. <https://10.3334/ORNLDAAC/1925>.
- 1046 Wolfe, G. M., Nicely, J. M., St Clair, J. M., Hanisco, T. F., Liao, J., Oman, L. D., Brune, W. B., Miller, D.,  
1047 Thames, A., Gonzalez Abad, G., Ryerson, T. B., Thompson, C. R., Peischl, J., McCain, K., Sweeney, C.,  
1048 Wennberg, P. O., Kim, M., Crouse, J. D., Hall, S. R., Ullmann, K., Diskin, G., Bui, P., Chang, C., and Dean-  
1049 Day, J.: Mapping hydroxyl variability throughout the global remote troposphere via synthesis of airborne  
1050 and satellite formaldehyde observations, *Proc Natl Acad Sci USA*, 116, 11171-11180,  
1051 <https://10.1073/pnas.1821661116>, 2019.
- 1052 Wolter, K., and Timlin, M. S.: El Niño/Southern Oscillation behaviour since 1871 as diagnosed in an  
1053 extended multivariate ENSO index (MEI.ext), *International Journal of Climatology*, 31, 1074-1087,  
1054 <https://10.1002/joc.2336>, 2011.
- 1055 Zhao, Y., Saunio, M., Bousquet, P., Lin, X., Berchet, A., Hegglin, M. I., Canadell, J. G., Jackson, R. B.,  
1056 Hauglustaine, D. A., Szopa, S., Stavert, A. R., Abraham, N. L., Archibald, A. T., Bekki, S., Deushi, M., Jöckel,  
1057 P., Josse, B., Kinnison, D., Kirner, O., Maréchal, V., Connor, F. M., Plummer, D. A., Revell, L. E., Rozanov, E.,  
1058 Stenke, A., Strode, S., Tilmes, S., Dlugokencky, E. J., and Zheng, B.: Inter-model comparison of global  
1059 hydroxyl radical (OH) distributions and their impact on atmospheric methane over the 2000-2016  
1060 period, *Atmospheric Chemistry and Physics*, 19, 13701-13723, [10.5194/acp-19-13701-2019](https://10.5194/acp-19-13701-2019), 2019.
- 1061 Zhu, L., Jacob, D. J., Kim, P. S., Fisher, J. A., Yu, K., Travis, K. R., Mickle, L. J., Yantosca, R. M., Sulprizio, M.  
1062 P., De Smedt, I., González Abad, G., Chance, K., Li, C., Ferrare, R., Fried, A., Hair, J. W., Hanisco, T. F.,  
1063 Richter, D., Jo Scarino, A., Walega, J., Weibring, P., and Wolfe, G. M.: Observing atmospheric  
1064 formaldehyde (HCHO) from space: validation and intercomparison of six retrievals from four satellites  
1065 (OMI, GOME2A, GOME2B, OMPS) with SEACRS aircraft observations over the southeast US, *Atmospheric  
1066 Chemistry and Physics*, 16, 13477-13490, [10.5194/acp-16-13477-2016](https://10.5194/acp-16-13477-2016), 2016.
- 1067  
1068 Zhu, Q., Laughner, J. L., and Cohen, R. C.: Combining Machine Learning and Satellite Observations to  
1069 Predict Spatial and Temporal Variation of near Surface OH in North American Cities, *Environmental  
1070 Science & Technology*, 7362 - 7371, <https://10.1021/acs.est.1c05636>, 2022a.



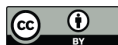

1071  
1072 Zhu, Q., Laughner, J. L., and Cohen, R. C.: Estimate of OH trends over one decade in North American  
1073 cities, Proc Natl Acad Sci U S A, 119, e2117399119, <https://doi.org/10.1073/pnas.2117399119>, 2022b.  
1074  
1075
